# Supplementary material
Source: PubMed Central journal article supplement (PMC8782625)
Supplement: NIHMS1769075-supplement-mmc.pdf [file NIHMS1769075-supplement-mmc.pdf]

# THE LANCET HIV

## Supplementary appendix

This appendix formed part of the original submission and has been peer reviewed. We post it as supplied by the authors.

Supplement to: Han WM, Law MG, Egger M, et al. Global estimates of viral suppression in children and adolescents and adults on antiretroviral therapy adjusted for missing viral load measurements: a multiregional, retrospective cohort study in 31 countries. *Lancet HIV* 2021; **8**: e766–75.

## Supplementary Appendix

**Supplementary Box 1.** Steps taken to estimate the overall proportions of people living with HIV (PWH) alive\* having viral load (VL) <1000 copies/mL in the IeDEA global consortium, by regions.

### **1) PWH in follow-up**

*a) With a viral load test:*

- The number and proportion of PWH in care with VL <1000 copies/mL were obtained from available data at each time point.
- Plausible range of PWH with VL <1000 copies/mL was estimated by multiplying the number of PWH in our study who had VL test by the lowest and highest percentages suppressed, extracted from the literature on PWH on ART as follows:

**Asia-Pacific:** 68-89% for children/adolescents (1) and 80-96% for adults (2, 3)

**CCASAnet:** 57-91% for children/adolescents (4, 5) and 52-92% for adults (6)

**NA-ACCORD:** 73-89% for adults (7, 8)

**Central, East, Southern, West Africa:** 48-92% for children (9, 10) and 60-97% for adults (11, 12)

*b) Without a viral load test:*

- The number of PWH with VL <1000 copies/mL at each time point was obtained by multiplying the number with no VL test by the proportion with VL <1000 copies/mL in our study. - Plausible range was estimated by multiplying the number of PWH without a VL test in our data by the lowest and highest percentages suppressed, extracted from the literature on PWH on ART.

### **2) PWH transferred out**

- We estimated number of deaths among those transferred by applying the percent of death in PWH in follow-up in our data to the number of transferred PWH.

- Plausible range of death was obtained by applying the lowest and highest percentages of death reported for PWH on ART in the literature to the number of transferred PWH in our data as follow:

**Asia-Pacific:** 5-9% for children/adolescents (13, 14) and 4-6% for adults (15)

**CCASAnet:** 5-16% children/adolescents (16) and 1-9% for adults (6, 17)

**Central, East, Southern, West Africa:** 4-17% for children/adolescents (18, 19) and 1-18% for adults (20, 21)

- The estimated death was removed from those transferred.
- Number of PWH with VL <1000 copies/mL among transferred assumed to be alive was then obtained at each time point by using percent suppressed in our data.
- Plausible range with VL <1000 copies/mL among transferred PWH assumed to be alive, was obtained by applying the lowest and highest percent suppressed reported in literature on PWH on ART (the same figures as the PWH in care with viral load measurements).

### **3) PWH lost to follow-up**

- The number of lost to follow-up PWH with known outcomes was obtained by applying the average (plausible range) percentages with known status among LTFU PWH reported in the tracing studies (75% [71%-86%]) (22-24).
- We estimated number of deaths among LTFU with known status by multiplying the average percentage of death among LTFU PWH reported in the tracing studies (75%) (22-24).
- Plausible range of death was obtained using the lowest and highest percentage of death among LTFU PWH reported in the tracing studies (71-86%) (22-24).
- The estimated number of deaths was removed from the total LTFU with known outcomes.
- Number of PWH with VL <1000 copies/mL in those who re-connected to care (unofficial transfers) was estimated by applying the percentage of suppressed VL (51%) reported for reconnected PWH in the tracing studies (24).
- Sensitivity analyses varying the common estimate of viral suppression among re-connected to care PWH were provided in the supplementary figures S1 and S2 (appendix pp 19-20).

### **Total estimated number with suppressed VL**

This is the sum of PWH with VL <1000 copies estimated among the above 3 groups: PWH in follow-up (a and b), PWH who were transferred out and PWH who were classified as LTFU and reconnected to care.

\*The included studies used different threshold to define viral suppression and the majority provided an overall proportion of virologically suppressed PWH among those in care, or LTFU without taking the duration of ART treatment into account.

**Table S1.** Unweighted and inverse-variance weighted of the proportions of VL outcomes, transfers, LTFU and mortality of children/adolescents and adults at year 1, 2 and 3 after ART initiation in the IeDEA global consortium

| <b>Children/Adolescents</b> |                             |                          |                          |                      |                      |                      |
|-----------------------------|-----------------------------|--------------------------|--------------------------|----------------------|----------------------|----------------------|
|                             | <b>VL&lt;1000 copies/mL</b> | <b>VL≥1000 copies/mL</b> | <b>No VL measurement</b> | <b>Transfer out</b>  | <b>LTFU</b>          | <b>Death</b>         |
| <b>Year 1</b>               | Proportions (95% CI)        | Proportions (95% CI)     | Proportions (95% CI)     | Proportions (95% CI) | Proportions (95% CI) | Proportions (95% CI) |
| Unweighted average          | 35.7 (35.00-36.3)           | 12.7 (12.2-13.2)         | 22.8 (22.3-23.4)         | 7.2 (6.8-7.5)        | 18.6 (18.0-19.1)     | 3.1 (2.9-3.3)        |
| Fixed effects               | 35.9 (35.2-36.6)            | 12.7 (12.3-13.2)         | 23.0 (22.5-23.6)         | 7.9 (7.5-8.3)        | 20.1 (19.6-20.7)     | 3.6 (3.4-3.9)        |
| Random effects              | 40.7 (33.2-48.6)            | 12.2 (11.2-13.3)         | 19.5 (16.4-23.0)         | 4.0 (2.3-7.1)        | 15.8 (10.2-23.7)     | 2.2 (1.1-4.2)        |
| <b>Year 2</b>               | Proportions (95% CI)        | Proportions (95% CI)     | Proportions (95% CI)     | Proportions (95% CI) | Proportions (95% CI) | Proportions (95% CI) |
| Unweighted average          | 29.8 (29.2-30.5)            | 10.1 (9.7-10.6)          | 18.2 (17.6-18.7)         | 12.4 (11.9-12.9)     | 25.8 (25.2-26.4)     | 3.7 (3.4-3.9)        |
| Fixed effects               | 30.2 (29.5-30.9)            | 10.2 (9.8-10.6)          | 18.5 (17.9-19.1)         | 13.6 (13.1-14.1)     | 27.3 (26.6-28.0)     | 4.2 (3.9-4.5)        |
| Random effects              | 33.1 (25.2-42.2)            | 10.0 (8.7-11.5)          | 15.5 (12.1-19.6)         | 6.8 (3.9-11.8)       | 25.5 (17.1-36.0)     | 2.7 (1.4-5.0)        |
| <b>Year 3</b>               | Proportions (95% CI)        | Proportions (95% CI)     | Proportions (95% CI)     | Proportions (95% CI) | Proportions (95% CI) | Proportions (95% CI) |
| Unweighted average          | 24.4 (23.7-25.0)            | 7.7 (7.3-8.1)            | 13.2 (12.7-13.7)         | 17.5 (16.9-18.1)     | 33.1 (32.4-33.8)     | 4.2 (3.9-4.5)        |
| Fixed effects               | 25.2 (24.6-25.9)            | 7.8 (7.4 - 8.2)          | 13.9 (13.3-14.4)         | 18.9 (18.3 - 19.6)   | 33.9 (33.2-34.7)     | 4.8 (4.5-5.2)        |
| Random effects              | 24.8 (16.2 - 36.0)          | 7.9 (6.7 - 9.3)          | 12.3 (8.4-17.7)          | 9.6 (5.6 - 16.1)     | 38.8 (27.1-52.0)     | 3.1 (1.7-5.7)        |
| <b>Adults</b>               |                             |                          |                          |                      |                      |                      |
| <b>Year 1</b>               | Proportions (95% CI)        | Proportions (95% CI)     | Proportions (95% CI)     | Proportions (95% CI) | Proportions (95% CI) | Proportions (95% CI) |
| Unweighted average          | 44.3 (44.1-44.5)            | 5.5 (5.4-5.6)            | 20.8 (20.7-21.0)         | 6.9 (6.8-7.0)        | 19.4 (19.3-19.6)     | 3.05 (3.0-3.1)       |
| Fixed effects               | 44.1 (43.9-44.3)            | 5.6 (5.5-5.6)            | 21.3 (21.1-21.5)         | 8.0 (7.9-8.1)        | 19.8 (19.7-20.0)     | 3.1 (3.1-3.2)        |
| Random effects              | 48.2 (40.9-55.5)            | 4.9 (4.0-5.9)            | 16.1 (12.7-20.1)         | 2.3 (1.3-4.2)        | 19.4 (14.7-25.2)     | 3.0 (2.3-3.8)        |

| <b>Year 2</b>      | Proportions (95% CI) |
|--------------------|----------------------|----------------------|----------------------|----------------------|----------------------|----------------------|
| Unweighted average | 35.8 (35.6-36.0)     | 4.2 (4.1-4.3)        | 16.9 (16.7-17.0)     | 11.2 (11.0-11.3)     | 28.0 (27.8-28.1)     | 4.0 (3.9-4.1)        |
| Fixed effects      | 35.9 (35.7-36.1)     | 4.3 (4.2-4.4)        | 17.4 (17.2-17.5)     | 12.7 (12.5-12.8)     | 28.1 (28.0-28.3)     | 4.1 (4.0-4.2)        |
| Random effects     | 38.3 (30.9-46.2)     | 3.4 (2.6-4.3)        | 12.3 (9.1-16.4)      | 3.9 (2.2-6.9)        | 31.3 (24.4-39.1)     | 3.9 (3.1-4.9)        |
| <b>Year 3</b>      | Proportions (95% CI) |
| Unweighted average | 28.8 (28.6-29.0)     | 3.2 (3.2-3.3)        | 12.2 (12.0-12.3)     | 15.0 (14.8-15.1)     | 36.0 (35.8-36.2)     | 4.8 (4.7-4.9)        |
| Fixed effects      | 29.3 (29.1-29.5)     | 3.4 (3.3-3.5)        | 12.9 (12.7-13.0)     | 16.8 (16.7-17.0)     | 35.6 (35.4-35.8)     | 5.0 (4.9-5.1)        |
| Random effects     | 24.7 (18.5-32.2)     | 2.7 (2.0-3.7)        | 10.6 (6.9-15.9)      | 5.4 (3.1-9.2)        | 48.1 (39.3-57.0)     | 4.7 (3.6-6.1)        |

Note: An inverse variance weighted meta-analysis of the proportions was conducted across regions to account for the differences between the sizes of the cohorts. As significant heterogeneity was observed, a random-effects meta-analysis was also conducted. Estimates from these meta-analyses are also provided. The random-effects meta-analyses estimates resulted in wide confidence intervals that reflect the level of heterogeneity. Nevertheless, the point estimates remained largely similar to the overall cohort estimates.

**Table S2. Estimated proportions of children/adolescents still alive with suppressed HIV viral load (VL) <1000 copies/mL by years on ART, stratified by IeDEA region**

| <b>Asia-Pacific</b>                                   | <b>Year 1</b>                   |                                       | <b>Year 2</b>                   |                                       | <b>Year 3</b>                   |                                       |
|-------------------------------------------------------|---------------------------------|---------------------------------------|---------------------------------|---------------------------------------|---------------------------------|---------------------------------------|
|                                                       | <b>Total (plausible ranges)</b> | <b>Proportions (plausible ranges)</b> | <b>Total (plausible ranges)</b> | <b>Proportions (plausible ranges)</b> | <b>Total (plausible ranges)</b> | <b>Proportions (plausible ranges)</b> |
| <i>Total with suppressed VL</i>                       | <b>789</b> (636-833)            | 0.84 (0.68-0.89)                      | <b>729</b> (577-755)            | 0.86 (0.68-0.89)                      | <b>646</b> (507-663)            | 0.87 (0.68-0.89)                      |
| <i>Total with unsuppressed VL</i>                     | <b>147</b>                      |                                       | <b>119</b>                      |                                       | <b>99</b>                       |                                       |
| <i>Total deaths (cumulative)</i>                      | <b>11</b>                       |                                       | <b>17</b>                       |                                       | <b>18</b>                       |                                       |
| <i>Total with No VL</i>                               | <b>429</b>                      |                                       | <b>357</b>                      |                                       | <b>245</b>                      |                                       |
| Estimated suppressed VL                               | 362 (292-382)                   | 0.84 (0.68-0.89)                      | 307 (243-318)                   | 0.86 (0.68-0.89)                      | 212 (167-218)                   | 0.87 (0.68-0.89)                      |
| <i>Total transfers (cumulative)</i>                   | <b>45</b>                       |                                       | <b>94</b>                       |                                       | <b>146</b>                      |                                       |
| Estimated deaths                                      | 0 (0-4)                         | 0.01 (0.01-0.09)                      | 1 (1-9)                         | 0.01 (0.01-0.09)                      | 2 (2-14)                        | 0.01 (0.01-0.09)                      |
| Estimated suppressed VL                               | 38 (31-40)                      | 0.84 (0.68-0.89)                      | 80 (63-83)                      | 0.86 (0.68-0.89)                      | 125 (98-128)                    | 0.87 (0.68-0.89)                      |
| <i>Total LTFU (cumulative)</i>                        | <b>19</b>                       |                                       | <b>41</b>                       |                                       | <b>71</b>                       |                                       |
| Estimated with known status                           | 14 (13-16)                      | 0.75 (0.71-0.86)                      | 31 (29-35)                      | 0.75 (0.71-0.86)                      | 53 (50-61)                      | 0.75 (0.71-0.86)                      |
| Estimated death                                       | 3 (3-4)                         | 0.21 (0.19-0.32)                      | 7 (6-10)                        | 0.21 (0.19-0.32)                      | 11 (10-17)                      | 0.21 (0.19-0.32)                      |
| Estimated re-connected to care (unofficial transfers) | 6 (3-8)                         | 0.55 (0.31-0.74)                      | 13 (7-18)                       | 0.55 (0.31-0.74)                      | 23 (13-31)                      | 0.55 (0.31-0.74)                      |
| Estimated suppressed VL among re-connected to care    | 3 (2-4)                         | 0.51 (0.28-0.72)                      | 7 (4-9)                         | 0.51 (0.28-0.72)                      | 12 (6-17)                       | 0.51 (0.28-0.72)                      |
| <b>Total estimated suppressed VL</b>                  | <b>1192 (961-1259)</b>          | <b>0.84 (0.67-0.88)</b>               | <b>1123 (887-1165)</b>          | <b>0.84 (0.67-0.87)</b>               | <b>995 (778-1026)</b>           | <b>0.83 (0.65-0.86)</b>               |
| <b>Total non-deaths</b>                               | <b>1426</b>                     |                                       | <b>1332</b>                     |                                       | <b>1194</b>                     |                                       |

  

| <b>CCASAnet</b>                   | <b>Year 1</b>                   |                                       | <b>Year 2</b>                   |                                       | <b>Year 3</b>                   |                                       |
|-----------------------------------|---------------------------------|---------------------------------------|---------------------------------|---------------------------------------|---------------------------------|---------------------------------------|
|                                   | <b>Total (plausible ranges)</b> | <b>Proportions (plausible ranges)</b> | <b>Total (plausible ranges)</b> | <b>Proportions (plausible ranges)</b> | <b>Total (plausible ranges)</b> | <b>Proportions (plausible ranges)</b> |
| <i>Total with suppressed VL</i>   | <b>143</b> (103-165)            | 0.79 (0.57-0.91)                      | <b>112</b> (83-132)             | 0.77 (0.57-0.91)                      | <b>86</b> (62-98)               | 0.80 (0.57-0.91)                      |
| <i>Total with unsuppressed VL</i> | <b>38</b>                       |                                       | <b>33</b>                       |                                       | <b>22</b>                       |                                       |
| <i>Total deaths (cumulative)</i>  | <b>2</b>                        |                                       | <b>2</b>                        |                                       | <b>2</b>                        |                                       |

|                                                          |                      |                         |                      |                         |                     |                         |
|----------------------------------------------------------|----------------------|-------------------------|----------------------|-------------------------|---------------------|-------------------------|
| <b>Total with no VL</b>                                  | <b>28</b>            |                         | <b>34</b>            |                         | <b>32</b>           |                         |
| Estimated suppressed VL                                  | 22 (16-25)           | 0.79 (0.57-0.91)        | 26 (19-31)           | 0.77 (0.57-0.91)        | 25 (18-29)          | 0.80 (0.57-0.91)        |
| <b>Total transfers (cumulative)</b>                      | <b>5</b>             |                         | <b>7</b>             |                         | <b>7</b>            |                         |
| Estimated deaths                                         | 0 (0-1)              | 0.01 (0.01-0.13)        | 0 (0-1)              | 0.0 (0.01-0.13)         | 0 (0-1)             | 0.0 (0.01-0.13)         |
| Estimated suppressed VL                                  | 4 (3-5)              | 0.79 (0.57-0.91)        | 5 (4-6)              | 0.77 (0.57-0.91)        | 6 (4-6)             | 0.80 (0.57-0.91)        |
| <b>Total LTFU (cumulative)</b>                           | <b>29</b>            |                         | <b>48</b>            |                         | <b>75</b>           |                         |
| Estimated with known status                              | 22 (21-25)           | 0.75 (0.71-0.86)        | 36 (34-41)           | 0.75 (0.71-0.86)        | 56 (53-65)          | 0.75 (0.71-0.86)        |
| Estimated death                                          | 5 (4-7)              | 0.21 (0.19-0.32)        | 8 (7-12)             | 0.21 (0.19-0.32)        | 12 (11-18)          | 0.21 (0.19-0.32)        |
| Estimated re-connected to care<br>(unofficial transfers) | 9 (5-13)             | 0.55 (0.31-0.74)        | 15 (9-21)            | 0.55 (0.31-0.74)        | 24 (14-33)          | 0.55 (0.31-0.74)        |
| Estimated suppressed VL among re-<br>connected to care   | 5 (3-6)              | 0.51 (0.28-0.72)        | 8 (4-11)             | 0.51 (0.28-0.72)        | 12 (7-17)           | 0.51 (0.28-0.72)        |
| <b>Total estimated suppressed VL</b>                     | <b>174 (125-201)</b> | <b>0.73 (0.53-0.84)</b> | <b>151 (110-180)</b> | <b>0.67 (0.49-0.80)</b> | <b>129 (91-150)</b> | <b>0.61 (0.43-0.71)</b> |
| <b>Total non-deaths</b>                                  | <b>238</b>           |                         | <b>226</b>           |                         | <b>210</b>          |                         |

| <b>Central Africa</b>                                    | <b>Year 1</b>                   |                                       | <b>Year 2</b>                   |                                       | <b>Year 3</b>                   |                                       |
|----------------------------------------------------------|---------------------------------|---------------------------------------|---------------------------------|---------------------------------------|---------------------------------|---------------------------------------|
|                                                          | <b>Total (plausible ranges)</b> | <b>Proportions (plausible ranges)</b> | <b>Total (plausible ranges)</b> | <b>Proportions (plausible ranges)</b> | <b>Total (plausible ranges)</b> | <b>Proportions (plausible ranges)</b> |
| <b>Total with suppressed VL</b>                          | 72 (42-81)                      | 0.82 (0.48-0.92)                      | 40 (22-42)                      | 0.87 (0.48-0.92)                      |                                 |                                       |
| <b>Total with unsuppressed VL</b>                        | <b>16</b>                       |                                       | <b>6</b>                        |                                       |                                 |                                       |
| <b>Total deaths (cumulative)</b>                         | <b>1</b>                        |                                       | <b>1</b>                        |                                       |                                 |                                       |
| <b>Total with no VL</b>                                  | <b>14</b>                       |                                       | <b>9</b>                        |                                       |                                 |                                       |
| Estimated suppressed VL                                  | 11 (7-13)                       | 0.82 (0.48-0.92)                      | 8 (4-8)                         | 0.87 (0.48-0.92)                      |                                 |                                       |
| <b>Total transfers (cumulative)</b>                      | <b>0</b>                        |                                       | <b>0</b>                        |                                       |                                 |                                       |
| <b>Total LTFU (cumulative)</b>                           | <b>64</b>                       |                                       | <b>103</b>                      |                                       |                                 |                                       |
| Estimated with known status                              | 48 (45-55)                      | 0.75 (0.71-0.86)                      | 77 (73-89)                      | 0.75 (0.71-0.86)                      |                                 |                                       |
| Estimated death                                          | 10 (9-15)                       | 0.21 (0.19-0.32)                      | 16 (15-25)                      | 0.21 (0.19-0.32)                      |                                 |                                       |
| Estimated re-connected to care<br>(unofficial transfers) | 21 (12-28)                      | 0.55 (0.31-0.74)                      | 34 (19-45)                      | 0.55 (0.31-0.74)                      |                                 |                                       |
| Estimated suppressed VL among re-<br>connected to care   | 11 (6-15)                       | 0.51 (0.28-0.72)                      | 17 (10-24)                      | 0.51 (0.28-0.72)                      |                                 |                                       |
| <b>Total estimated suppressed VL</b>                     | <b>94 (55-109)</b>              | <b>0.60 (0.35-0.70)</b>               | <b>65 (36-74)</b>               | <b>0.46 (0.25-0.52)</b>               |                                 |                                       |

| <b>Total non-deaths</b>                               |                                 | <b>156</b>                            |                                 |                                       | <b>142</b>                      |                                       |  |
|-------------------------------------------------------|---------------------------------|---------------------------------------|---------------------------------|---------------------------------------|---------------------------------|---------------------------------------|--|
|                                                       | <b>Year 1</b>                   |                                       | <b>Year 2</b>                   |                                       | <b>Year 3</b>                   |                                       |  |
| <b>East Africa</b>                                    | <b>Total (plausible ranges)</b> | <b>Proportions (plausible ranges)</b> | <b>Total (plausible ranges)</b> | <b>Proportions (plausible ranges)</b> | <b>Total (plausible ranges)</b> | <b>Proportions (plausible ranges)</b> |  |
| <i>Total with suppressed VL</i>                       | <b>1995</b> (1292-2476)         | 0.74 (0.48-0.92)                      | <b>1560</b> (1017-1949)         | 0.74 (0.48-0.92)                      | <b>1146</b> (728-1395)          | 0.76 (0.48-0.92)                      |  |
| <i>Total with unsuppressed VL</i>                     | <b>696</b>                      |                                       | <b>558</b>                      |                                       | <b>370</b>                      |                                       |  |
| <i>Total deaths (cumulative)</i>                      | <b>174</b>                      |                                       | <b>201</b>                      |                                       | <b>216</b>                      |                                       |  |
| <i>Total with No VL</i>                               | <b>1257</b>                     |                                       | <b>721</b>                      |                                       | <b>308</b>                      |                                       |  |
| Estimated suppressed VL                               | 932 (603-1156)                  | 0.74 (0.48-0.92)                      | 531 (346-663)                   | 0.74 (0.48-0.92)                      | 233 (148-283)                   | 0.76 (0.48-0.92)                      |  |
| <i>Total transfers (cumulative)</i>                   | <b>270</b>                      |                                       | <b>419</b>                      |                                       | <b>518</b>                      |                                       |  |
| Estimated deaths                                      | 10 (10-46)                      | 0.04 (0.04-0.17)                      | 19 (17-72)                      | 0.05 (0.04-0.17)                      | 27 (21-89)                      | 0.05 (0.04-0.17)                      |  |
| Estimated suppressed VL                               | 193 (125-239)                   | 0.74 (0.48-0.92)                      | 295 (192-368)                   | 0.74 (0.48-0.92)                      | 371 (236-452)                   | 0.76 (0.48-0.92)                      |  |
| <i>Total LTFU (cumulative)</i>                        | <b>1041</b>                     |                                       | <b>1274</b>                     |                                       | <b>1380</b>                     |                                       |  |
| Estimated with known status                           | 781 (739-895)                   | 0.75 (0.71-0.86)                      | 956 (905-1096)                  | 0.75 (0.71-0.86)                      | 1035 (980-1187)                 | 0.75 (0.71-0.86)                      |  |
| Estimated deaths                                      | 164 (148-250)                   | 0.21 (0.19-0.32)                      | 201 (182-306)                   | 0.21 (0.19-0.32)                      | 217 (197-331)                   | 0.21 (0.19-0.32)                      |  |
| Estimated re-connected to care (unofficial transfers) | 339 (191-457)                   | 0.55 (0.31-0.74)                      | 415 (234-559)                   | 0.55 (0.31-0.74)                      | 450 (254-605)                   | 0.55 (0.31-0.74)                      |  |
| Estimated suppressed VL among re-connected to care    | 173 (95-244)                    | 0.51 (0.28-0.72)                      | 212 (116-299)                   | 0.51 (0.28-0.72)                      | 230 (126-324)                   | 0.51 (0.28-0.72)                      |  |
| <b>Total estimated suppressed VL</b>                  | <b>3293 (2115-4115)</b>         | <b>0.65 (0.42-0.81)</b>               | <b>2598 (1671-3279)</b>         | <b>0.60 (0.39-0.76)</b>               | <b>1980 (1238-2454)</b>         | <b>0.57 (0.36-0.71)</b>               |  |
| <b>Total non-deaths</b>                               | <b>5085</b>                     |                                       | <b>4312</b>                     |                                       | <b>3478</b>                     |                                       |  |

|                                   | <b>Year 1</b>                   |                                       | <b>Year 2</b>                   |                                       | <b>Year 3</b>                   |                                       |
|-----------------------------------|---------------------------------|---------------------------------------|---------------------------------|---------------------------------------|---------------------------------|---------------------------------------|
| <b>Southern Africa</b>            | <b>Total (plausible ranges)</b> | <b>Proportions (plausible ranges)</b> | <b>Total (plausible ranges)</b> | <b>Proportions (plausible ranges)</b> | <b>Total (plausible ranges)</b> | <b>Proportions (plausible ranges)</b> |
| <i>Total with suppressed VL</i>   | <b>3489</b> (2378-4559)         | 0.72 (0.48-0.92)                      | <b>2899</b> (1890-3623)         | 0.74 (0.48-0.92)                      | <b>2163</b> (1387-2659)         | 0.75 (0.48-0.92)                      |
| <i>Total with unsuppressed VL</i> | <b>1466</b>                     |                                       | <b>1039</b>                     |                                       | <b>727</b>                      |                                       |
| <i>Total deaths (cumulative)</i>  | <b>263</b>                      |                                       | <b>287</b>                      |                                       | <b>300</b>                      |                                       |
| <i>Total with No VL</i>           | <b>2615</b>                     |                                       | <b>2123</b>                     |                                       | <b>1582</b>                     |                                       |
| Estimated suppressed VL           | 1894 (1255-2406)                | 0.72 (0.48-0.92)                      | 1563 (1019-1953)                | 0.74 (0.48-0.92)                      | 1184 (759-1455)                 | 0.75 (0.48-0.92)                      |



|                                                       |                         |                         |                         |                         |                         |                         |
|-------------------------------------------------------|-------------------------|-------------------------|-------------------------|-------------------------|-------------------------|-------------------------|
| <b>Total transfers (cumulative)</b>                   | <b>1093</b>             |                         | <b>1780</b>             |                         | <b>2311</b>             |                         |
| Estimated deaths                                      | 34 (34-187)             | 0.03 (0.03-0.17)        | 72 (72-304)             | 0.04 (0.04-0.17)        | 114 (95-395)            | 0.05 (0.04-0.17)        |
| Estimated suppressed VL                               | 767 (508-974)           | 0.72 (0.48-0.92)        | 1257 (820-1571)         | 0.74 (0.48-0.92)        | 1644 (1055-2021)        | 0.75 (0.48-0.92)        |
| <b>Total LTFU (cumulative)</b>                        | <b>1858</b>             |                         | <b>2531</b>             |                         | <b>3071</b>             |                         |
| Estimated with known status                           | 1394 (1319-1598)        | 0.75 (0.71-0.86)        | 1898 (1797-2177)        | 0.75 (0.71-0.86)        | 2303 (2180-2641)        | 0.75 (0.71-0.86)        |
| Estimated deaths                                      | 293 (265-446)           | 0.21 (0.19-0.32)        | 399 (361-607)           | 0.21 (0.19-0.32)        | 484 (438-737)           | 0.21 (0.19-0.32)        |
| Estimated re-connected to care (unofficial transfers) | 606 (341-815)           | 0.55 (0.31-0.74)        | 824 (465-1109)          | 0.55 (0.31-0.74)        | 1000 (564-1346)         | 0.55 (0.31-0.74)        |
| Estimated suppressed VL among re-connected to care    | 309 (170-436)           | 0.51 (0.28-0.72)        | 420 (231-593)           | 0.51 (0.28-0.72)        | 510 (280-720)           | 0.51 (0.28-0.72)        |
| <b>Total estimated suppressed VL</b>                  | <b>6459 (4311-8375)</b> | <b>0.63 (0.42-0.82)</b> | <b>6139 (3960-7740)</b> | <b>0.62 (0.40-0.78)</b> | <b>5501 (3481-6855)</b> | <b>0.59 (0.38-0.74)</b> |
| <b>Total non-deaths</b>                               | <b>10194</b>            |                         | <b>9901</b>             |                         | <b>9256</b>             |                         |

| <b>West Africa</b>                                    | <b>Year 1</b>                   |                                       | <b>Year 2</b>                   |                                       | <b>Year 3</b>                   |                                       |
|-------------------------------------------------------|---------------------------------|---------------------------------------|---------------------------------|---------------------------------------|---------------------------------|---------------------------------------|
|                                                       | <b>Total (plausible ranges)</b> | <b>Proportions (plausible ranges)</b> | <b>Total (plausible ranges)</b> | <b>Proportions (plausible ranges)</b> | <b>Total (plausible ranges)</b> | <b>Proportions (plausible ranges)</b> |
| <b>Total with suppressed VL</b>                       | <b>455 (332-636)</b>            | 0.66 (0.48-0.92)                      | <b>369 (266-510)</b>            | 0.67 (0.48-0.92)                      | <b>245 (182-350)</b>            | 0.64 (0.48-0.92)                      |
| <b>Total with unsuppressed VL</b>                     | <b>236</b>                      |                                       | <b>185</b>                      |                                       | <b>135</b>                      |                                       |
| <b>Total deaths (cumulative)</b>                      | <b>181</b>                      |                                       | <b>191</b>                      |                                       | <b>198</b>                      |                                       |
| <b>Total with No VL</b>                               | <b>333</b>                      |                                       | <b>231</b>                      |                                       | <b>151</b>                      |                                       |
| Estimated suppressed VL                               | 219 (160-306)                   | 0.66 (0.48-0.92)                      | 154 (111-213)                   | 0.67 (0.48-0.92)                      | 97 (72-139)                     | 0.64 (0.48-0.92)                      |
| <b>Total transfers (cumulative)</b>                   | <b>52</b>                       |                                       | <b>72</b>                       |                                       | <b>94</b>                       |                                       |
| Estimated deaths                                      | 7 (2-9)                         | 0.14 (0.04-0.17)                      | 12 (3-12)                       | 0.16 (0.04-0.17)                      | 19 (4-19)                       | 0.20 (0.04-0.20)                      |
| Estimated suppressed VL                               | 30 (22-41)                      | 0.66 (0.48-0.92)                      | 40 (29-55)                      | 0.67 (0.48-0.92)                      | 48 (36-69)                      | 0.64 (0.48-0.92)                      |
| <b>Total LTFU (cumulative)</b>                        | <b>792</b>                      |                                       | <b>943</b>                      |                                       | <b>1095</b>                     |                                       |
| Estimated with known status                           | 594 (562-681)                   | 0.75 (0.71-0.86)                      | 707 (670-811)                   | 0.75 (0.71-0.86)                      | 821 (777-942)                   | 0.75 (0.71-0.86)                      |
| Estimated deaths                                      | 125 (113-190)                   | 0.21 (0.19-0.32)                      | 148 (134-226)                   | 0.21 (0.19-0.32)                      | 172 (156-263)                   | 0.21 (0.19-0.32)                      |
| Estimated re-connected to care (unofficial transfers) | 258 (145-347)                   | 0.55 (0.31-0.74)                      | 307 (173-414)                   | 0.55 (0.31-0.74)                      | 357 (201-480)                   | 0.55 (0.31-0.74)                      |
| Estimated suppressed VL among re-connected to care    | 132 (72-186)                    | 0.51 (0.28-0.72)                      | 157 (86-221)                    | 0.51 (0.28-0.72)                      | 182 (100-257)                   | 0.51 (0.28-0.72)                      |

|                                      |                       |                         |                      |                         |                      |                         |
|--------------------------------------|-----------------------|-------------------------|----------------------|-------------------------|----------------------|-------------------------|
| <b>Total estimated suppressed VL</b> | <b>836 (586-1169)</b> | <b>0.48 (0.34-0.67)</b> | <b>720 (492-999)</b> | <b>0.44 (0.30-0.61)</b> | <b>572 (390-815)</b> | <b>0.37 (0.26-0.53)</b> |
| <b>Total non-deaths</b>              | <b>1736</b>           |                         | <b>1640</b>          |                         | <b>1529</b>          |                         |

Children, <18 years at ART initiation; ART, consists of the combination of at least three antiretrovirals.

Note: Plausible ranges of estimated suppressed VL among re-connected to care were extracted from 95% CI of the tracing study (24).

**Abbreviations:** IQR, Interquartile range; CCASAnet, Caribbean/Central and South America.

**Table S3. Estimated proportions of adults still alive with suppressed HIV viral load (VL) <1000 copies/mL) by years on ART, stratified by IeDEA region**

| <b>Asia-Pacific</b>                                   | <b>Year 1</b>                   |                                       | <b>Year 2</b>                   |                                       | <b>Year 3</b>                   |                                       |
|-------------------------------------------------------|---------------------------------|---------------------------------------|---------------------------------|---------------------------------------|---------------------------------|---------------------------------------|
|                                                       | <b>Total (plausible ranges)</b> | <b>Proportions (plausible ranges)</b> | <b>Total (plausible ranges)</b> | <b>Proportions (plausible ranges)</b> | <b>Total (plausible ranges)</b> | <b>Proportions (plausible ranges)</b> |
| <i>Total with suppressed VL</i>                       | <b>981</b> (833-1000)           | 0.94 (0.80-0.96)                      | <b>847</b> (697-847)            | 0.97 (0.80-0.97)                      | <b>891</b> (734-891)            | 0.97 (0.80-0.97)                      |
| <i>Total with unsuppressed VL</i>                     | <b>61</b>                       |                                       | <b>24</b>                       |                                       | <b>26</b>                       |                                       |
| <i>Total deaths (cumulative)</i>                      | <b>65</b>                       |                                       | <b>78</b>                       |                                       | <b>90</b>                       |                                       |
| <i>Total with No VL</i>                               | <b>861</b>                      |                                       | <b>772</b>                      |                                       | <b>541</b>                      |                                       |
| Estimated suppressed VL                               | 809 (689-827)                   | 0.94 (0.80-0.96)                      | 749 (618-749)                   | 0.97 (0.80-0.97)                      | 525 (433-525)                   | 0.97 (0.80-0.97)                      |
| <i>Total transfers (cumulative)</i>                   | <b>45</b>                       |                                       | <b>63</b>                       |                                       | <b>85</b>                       |                                       |
| Estimated deaths                                      | 1 (1-3)                         | 0.03 (0.03-0.06)                      | 2 (2-4)                         | 0.04 (0.04-0.06)                      | 4 (3-5)                         | 0.05 (0.04-0.06)                      |
| Estimated suppressed VL                               | 41 (35-42)                      | 0.94 (0.80-0.96)                      | 59 (50-59)                      | 0.97 (0.80-0.97)                      | 79 (65-79)                      | 0.97 (0.80-0.97)                      |
| <i>Total LTFU (cumulative)</i>                        | <b>122</b>                      |                                       | <b>214</b>                      |                                       | <b>263</b>                      |                                       |
| Estimated with known status                           | 92 (87-105)                     | 0.75 (0.71-0.86)                      | 161 (152-184)                   | 0.75 (0.71-0.86)                      | 197 (187-226)                   | 0.75 (0.71-0.86)                      |
| Estimated deaths                                      | 19 (17-29)                      | 0.21 (0.19-0.32)                      | 34 (31-52)                      | 0.21 (0.19-0.32)                      | 41 (37-63)                      | 0.21 (0.19-0.32)                      |
| Estimated re-connected to care (unofficial transfers) | 40 (23-54)                      | 0.55 (0.31-0.74)                      | 70 (39-94)                      | 0.55 (0.31-0.74)                      | 86 (48-115)                     | 0.55 (0.31-0.74)                      |
| Estimated suppressed VL among re-connected to care    | 20 (11-29)                      | 0.51 (0.28-0.72)                      | 36 (20-50)                      | 0.51 (0.28-0.72)                      | 44 (24-62)                      | 0.51 (0.28-0.72)                      |
| <b>Total estimated suppressed VL</b>                  | <b>1851 (1568-1898)</b>         | <b>90% (77%-93%)</b>                  | <b>1691 (1385-1705)</b>         | <b>90% (73%-90%)</b>                  | <b>1539 (1246-1557)</b>         | <b>87% (71%-88%)</b>                  |
| <b>Total non-deaths</b>                               | <b>2050</b>                     |                                       | <b>1886</b>                     |                                       | <b>1761</b>                     |                                       |

  

| <b>CCASAnet</b>                   | <b>Year 1</b>                   |                                       | <b>Year 2</b>                   |                                       | <b>Year 3</b>                   |                                       |
|-----------------------------------|---------------------------------|---------------------------------------|---------------------------------|---------------------------------------|---------------------------------|---------------------------------------|
|                                   | <b>Total (plausible ranges)</b> | <b>Proportions (plausible ranges)</b> | <b>Total (plausible ranges)</b> | <b>Proportions (plausible ranges)</b> | <b>Total (plausible ranges)</b> | <b>Proportions (plausible ranges)</b> |
| <i>Total with suppressed VL</i>   | <b>6207</b> (3558-6295)         | 0.91 (0.52-0.92)                      | <b>5064</b> (2919-5164)         | 0.90 (0.52-0.92)                      | <b>3979</b> (2299-4067)         | 0.90 (0.52-0.92)                      |
| <i>Total with unsuppressed VL</i> | <b>635</b>                      |                                       | <b>549</b>                      |                                       | <b>442</b>                      |                                       |
| <i>Total deaths (cumulative)</i>  | <b>289</b>                      |                                       | <b>352</b>                      |                                       | <b>399</b>                      |                                       |
| <i>Total with No VL</i>           | <b>1306</b>                     |                                       | <b>999</b>                      |                                       | <b>764</b>                      |                                       |
| Estimated suppressed VL           | 1188 (679-1201)                 | 0.91 (0.52-0.92)                      | 899 (519-919)                   | 0.90 (0.52-0.92)                      | 688 (397-703)                   | 0.90 (0.52-0.92)                      |

|                                                       |                         |                      |                         |                      |                         |                      |
|-------------------------------------------------------|-------------------------|----------------------|-------------------------|----------------------|-------------------------|----------------------|
| <b>Total transfers (cumulative)</b>                   | <b>49</b>               |                      | <b>102</b>              |                      | <b>127</b>              |                      |
| Estimated deaths                                      | 1 (1-4)                 | 0.03 (0.01-0.09)     | 4 (1-9)                 | 0.04 (0.01-0.09)     | 6 (1-11)                | 0.05 (0.01-0.09)     |
| Estimated suppressed VL                               | 44 (25-45)              | 0.91 (0.52-0.92)     | 88 (51-90)              | 0.90 (0.52-0.92)     | 109 (63-113)            | 0.90 (0.52-0.92)     |
| <b>Total LTFU (cumulative)</b>                        | <b>1034</b>             |                      | <b>1663</b>             |                      | <b>2314</b>             |                      |
| Estimated with known status                           | 776 (734-889)           | 0.75 (0.71-0.86)     | 1247 (1181-1430)        | 0.75 (0.71-0.86)     | 1736 (1643-1990)        | 0.75 (0.71-0.86)     |
| Estimated deaths                                      | 163 (147-248)           | 0.21 (0.19-0.32)     | 262 (237-399)           | 0.21 (0.19-0.32)     | 365 (330-556)           | 0.21 (0.19-0.32)     |
| Estimated re-connected to care (unofficial transfers) | 337 (190-454)           | 0.55 (0.31-0.74)     | 542 (305-729)           | 0.55 (0.31-0.74)     | 754 (425-1015)          | 0.55 (0.31-0.74)     |
| Estimated suppressed VL among re-connected to care    | 172 (94-243)            | 0.51 (0.28-0.72)     | 276 (152-390)           | 0.51 (0.28-0.72)     | 385 (211-543)           | 0.51 (0.28-0.72)     |
| <b>Total estimated suppressed VL</b>                  | <b>7611 (4356-7784)</b> | <b>84% (48%-86%)</b> | <b>6327 (3641-6563)</b> | <b>78% (45%-81%)</b> | <b>5161 (2970-5426)</b> | <b>71% (41%-75%)</b> |
| <b>Total non-deaths</b>                               | <b>9067</b>             |                      | <b>8111</b>             |                      | <b>7255</b>             |                      |

| <b>NA-ACCORD</b>                                      | <b>Year 1</b>                   |                                       | <b>Year 2</b>                   |                                       | <b>Year 3</b>                   |                                       |
|-------------------------------------------------------|---------------------------------|---------------------------------------|---------------------------------|---------------------------------------|---------------------------------|---------------------------------------|
|                                                       | <b>Total (plausible ranges)</b> | <b>Proportions (plausible ranges)</b> | <b>Total (plausible ranges)</b> | <b>Proportions (plausible ranges)</b> | <b>Total (plausible ranges)</b> | <b>Proportions (plausible ranges)</b> |
| <b>Total with suppressed VL</b>                       | <b>6899 (5735-6991)</b>         | <b>0.88 (0.73-0.89)</b>               | <b>5333 (4401-5366)</b>         | <b>0.88 (0.73-0.89)</b>               | <b>4248 (3474-4248)</b>         | <b>0.89 (0.73-0.89)</b>               |
| <b>Total with unsuppressed VL</b>                     | <b>957</b>                      |                                       | <b>696</b>                      |                                       | <b>511</b>                      |                                       |
| <b>Total deaths (cumulative)</b>                      | <b>233</b>                      |                                       | <b>335</b>                      |                                       | <b>410</b>                      |                                       |
| <b>Total with No VL</b>                               | <b>551</b>                      |                                       | <b>515</b>                      |                                       | <b>372</b>                      |                                       |
| Estimated suppressed VL                               | 485 (402-490)                   | 0.88 (0.73-0.89)                      | 453 (376-458)                   | 0.88 (0.73-0.89)                      | 331 (272-331)                   | 0.89 (0.73-0.89)                      |
| <b>Total transfers (cumulative)</b>                   | <b>N/A</b>                      |                                       | <b>N/A</b>                      |                                       | <b>N/A</b>                      |                                       |
| Estimated deaths                                      | N/A                             |                                       | N/A                             |                                       | N/A                             |                                       |
| Estimated suppressed VL                               | N/A                             |                                       | N/A                             |                                       | N/A                             |                                       |
| <b>Total LTFU (cumulative)</b>                        | <b>1316</b>                     |                                       | <b>2003</b>                     |                                       | <b>2478</b>                     |                                       |
| Estimated with known status                           | 987 (934-1132)                  | 0.75 (0.71-0.86)                      | 1502 (1422-1723)                | 0.75 (0.71-0.86)                      | 1859 (1759-2131)                | 0.75 (0.71-0.86)                      |
| Estimated deaths                                      | 207 (188-316)                   | 0.21 (0.19-0.32)                      | 315 (285-481)                   | 0.21 (0.19-0.32)                      | 390 (353-595)                   | 0.21 (0.19-0.32)                      |
| Estimated re-connected to care (unofficial transfers) | 429 (242-577)                   | 0.55 (0.31-0.74)                      | 653 (368-878)                   | 0.55 (0.31-0.74)                      | 808 (455-1087)                  | 0.55 (0.31-0.74)                      |
| Estimated suppressed VL among re-connected to care    | 219 (120-309)                   | 0.51 (0.28-0.72)                      | 333 (183-470)                   | 0.51 (0.28-0.72)                      | 412 (226-582)                   | 0.51 (0.28-0.72)                      |
| <b>Total estimated suppressed VL</b>                  | <b>7603 (6257-7790)</b>         | <b>80% (66%-82%)</b>                  | <b>6119 (4960-6294)</b>         | <b>74% (60%-76%)</b>                  | <b>4991 (3972-5161)</b>         | <b>69% (55%-71%)</b>                  |

| Total non-deaths                                      | 9516                            |                                       | 8232                            |                                       | 7219                            |                                       |
|-------------------------------------------------------|---------------------------------|---------------------------------------|---------------------------------|---------------------------------------|---------------------------------|---------------------------------------|
| <b>Central Africa</b>                                 | <b>Year 1</b>                   |                                       | <b>Year 2</b>                   |                                       | <b>Year 3</b>                   |                                       |
|                                                       | <b>Total (plausible ranges)</b> | <b>Proportions (plausible ranges)</b> | <b>Total (plausible ranges)</b> | <b>Proportions (plausible ranges)</b> | <b>Total (plausible ranges)</b> | <b>Proportions (plausible ranges)</b> |
| <i>Total with suppressed VL</i>                       | <i>1014</i> (665-1075)          | 0.91 (0.60-0.97)                      | <i>504</i> (322-521)            | 0.94 (0.60-0.97)                      | <i>19</i> (12-19)               | 0.95 (0.60-0.97)                      |
| <i>Total with unsuppressed VL</i>                     | <i>95</i>                       |                                       | <i>33</i>                       |                                       | <i>1</i>                        |                                       |
| <i>Total deaths (cumulative)</i>                      | <i>29</i>                       |                                       | <i>36</i>                       |                                       | <i>37</i>                       |                                       |
| <i>Total with No VL</i>                               | <i>192</i>                      |                                       | <i>62</i>                       |                                       | <i>0</i>                        |                                       |
| Estimated suppressed VL                               | 175 (115-186)                   | 0.91 (0.60-0.97)                      | 58 (37-60)                      | 0.94 (0.60-0.97)                      | 0                               | 0.95 (0.60-0.97)                      |
| <i>Total transfers (cumulative)</i>                   | <i>N/A</i>                      |                                       | <i>N/A</i>                      |                                       | <i>N/A</i>                      |                                       |
| Estimated deaths                                      | N/A                             |                                       | N/A                             |                                       | N/A                             |                                       |
| Estimated suppressed VL                               | N/A                             | 0.91 (0.60-0.97)                      | N/A                             | 0.94 (0.60-0.97)                      | N/A                             | 0.95 (0.60-0.97)                      |
| <i>Total LTFU (cumulative)</i>                        | <i>1104</i>                     |                                       | <i>1593</i>                     |                                       | <i>1924</i>                     |                                       |
| Estimated with known status                           | 828 (784-949)                   | 0.75 (0.71-0.86)                      | 1195 (1131-1370)                | 0.75 (0.71-0.86)                      | 1443 (1366-1655)                | 0.75 (0.71-0.86)                      |
| Estimated deaths                                      | 174 (157-265)                   | 0.21 (0.19-0.32)                      | 251 (227-382)                   | 0.21 (0.19-0.32)                      | 303 (274-462)                   | 0.21 (0.19-0.32)                      |
| Estimated re-connected to care (unofficial transfers) | 360 (203-484)                   | 0.55 (0.31-0.74)                      | 519 (293-699)                   | 0.55 (0.31-0.74)                      | 627 (353-844)                   | 0.55 (0.31-0.74)                      |
| Estimated suppressed VL among re-connected to care    | 184 (101-259)                   | 0.51 (0.28-0.72)                      | 265 (145-374)                   | 0.51 (0.28-0.72)                      | 320 (176-451)                   | 0.51 (0.28-0.72)                      |
| <b>Total estimated suppressed VL</b>                  | <b>1373 (871-1520)</b>          | <b>62% (39%-68%)</b>                  | <b>807 (504-955)</b>            | <b>42% (26%-49%)</b>                  | <b>339 (188-470)</b>            | <b>21% (11%-29%)</b>                  |
| <b>Total non-deaths</b>                               | <b>2231</b>                     |                                       | <b>1941</b>                     |                                       | <b>1641</b>                     |                                       |

|                                   |                                 |                                       |                                 |                                       |                                 |                                       |
|-----------------------------------|---------------------------------|---------------------------------------|---------------------------------|---------------------------------------|---------------------------------|---------------------------------------|
| <b>East Africa</b>                | <b>Year 1</b>                   |                                       | <b>Year 2</b>                   |                                       | <b>Year 3</b>                   |                                       |
|                                   | <b>Total (plausible ranges)</b> | <b>Proportions (plausible ranges)</b> | <b>Total (plausible ranges)</b> | <b>Proportions (plausible ranges)</b> | <b>Total (plausible ranges)</b> | <b>Proportions (plausible ranges)</b> |
| <i>Total with suppressed VL</i>   | <i>23,928</i> (16,023-25,905)   | 0.90 (0.60-0.97)                      | <i>17,269</i> (11,451-18,512)   | 0.90 (0.60-0.97)                      | <i>10,979</i> (7233-11,693)     | 0.91 (0.60-0.97)                      |
| <i>Total with unsuppressed VL</i> | <i>2778</i>                     |                                       | <i>1816</i>                     |                                       | <i>1076</i>                     |                                       |
| <i>Total deaths (cumulative)</i>  | <i>2282</i>                     |                                       | <i>2612</i>                     |                                       | <i>2770</i>                     |                                       |
| <i>Total with No VL</i>           | <i>10,870</i>                   |                                       | <i>6199</i>                     |                                       | <i>2507</i>                     |                                       |

|                                                       |                               |                      |                               |                      |                               |                      |
|-------------------------------------------------------|-------------------------------|----------------------|-------------------------------|----------------------|-------------------------------|----------------------|
| Estimated suppressed VL                               | 9783 (6522-10,544)            | 0.90 (0.60-0.97)     | 5579 (3719-6013)              | 0.90 (0.60-0.97)     | 2281 (1504-2432)              | 0.91 (0.60-0.97)     |
| <b>Total transfers (cumulative)</b>                   | <b>2351</b>                   |                      | <b>3438</b>                   |                      | <b>4044</b>                   |                      |
| Estimated deaths                                      | 117 (25-456)                  | 0.05 (0.01-0.18)     | 208 (34-619)                  | 0.06 (0.01-0.18)     | 283 (40-728)                  | 0.07 (0.01-0.18)     |
| Estimated suppressed VL                               | 2011 (1340-2167)              | 0.90 (0.60-0.97)     | 2907 (1938-3133)              | 0.90 (0.60-0.97)     | 3422 (2257-3648)              | 0.91 (0.60-0.97)     |
| <b>Total LTFU (cumulative)</b>                        | <b>12,646</b>                 |                      | <b>15,596</b>                 |                      | <b>16,988</b>                 |                      |
| Estimated with known status                           | 9485 (8979-10,876)            | 0.75 (0.71-0.86)     | 11,697 (11,073-13,413)        | 0.75 (0.71-0.86)     | 12,741 (12,061-14,610)        | 0.75 (0.71-0.86)     |
| Estimated deaths                                      | 1931 (472-4668)               | 0.21 (0.19-0.32)     | 2361 (577-5705)               | 0.21 (0.19-0.32)     | 2512 (614-6071)               | 0.21 (0.19-0.32)     |
| Estimated re-connected to care (unofficial transfers) | 4121 (2323-5545)              | 0.55 (0.31-0.74)     | 5083 (2865-6838)              | 0.55 (0.31-0.74)     | 5536 (3120-7448)              | 0.55 (0.31-0.74)     |
| Estimated suppressed VL among re-connected to care    | 2102 (1154-2967)              | 0.51 (0.28-0.72)     | 2592 (1423-3660)              | 0.51 (0.28-0.72)     | 2823 (1550-3986)              | 0.51 (0.28-0.72)     |
| <b>Total estimated suppressed VL</b>                  | <b>37,824 (25,039-41,583)</b> | <b>75% (50%-82%)</b> | <b>30,354 (20,158-32,589)</b> | <b>73% (48%-78%)</b> | <b>19,505 (12,544-21,759)</b> | <b>59% (38%-66%)</b> |
| Total non-deaths                                      | 50,525                        |                      | 41,749                        |                      | 32,799                        |                      |

## Southern Africa

|                                                       | Year 1                        |                                | Year 2                        |                                | Year 3                        |                                |
|-------------------------------------------------------|-------------------------------|--------------------------------|-------------------------------|--------------------------------|-------------------------------|--------------------------------|
|                                                       | Total (plausible ranges)      | Proportions (plausible ranges) | Total (plausible ranges)      | Proportions (plausible ranges) | Total (plausible ranges)      | Proportions (plausible ranges) |
| <b>Total with suppressed VL</b>                       | <b>65,908</b> (44,634-72,158) | 0.89 (0.60-0.97)               | <b>48,984</b> (33,046-53,425) | 0.89 (0.60-0.97)               | <b>37,233</b> (24,977-36,116) | 0.90 (0.60-0.97)               |
| <b>Total with unsuppressed VL</b>                     | <b>8482</b>                   |                                | <b>6093</b>                   |                                | <b>4395</b>                   |                                |
| <b>Total deaths (cumulative)</b>                      | <b>4128</b>                   |                                | <b>5053</b>                   |                                | <b>5648</b>                   |                                |
| <b>Total with No VL</b>                               | <b>35,298</b>                 |                                | <b>27,853</b>                 |                                | <b>19,765</b>                 |                                |
| Estimated suppressed VL                               | 31,415 (21,179-34,239)        | 0.89 (0.60-0.97)               | 24,789 (16,712-27,017)        | 0.89 (0.60-0.97)               | 17,788 (11,859-19,172)        | 0.90 (0.60-0.97)               |
| <b>Total transfers (cumulative)</b>                   | <b>14,174</b>                 |                                | <b>20,968</b>                 |                                | <b>25,732</b>                 |                                |
| Estimated deaths                                      | 425 (142-2551)                | 0.03 (0.01-0.18)               | 1048 (210-3774)               | 0.05 (0.01-0.18)               | 1544 (257-4632)               | 0.06 (0.01-0.18)               |
| Estimated suppressed VL                               | 12,237 (8249-13,336)          | 0.89 (0.60-0.97)               | 17,729 (11,952-19,322)        | 0.89 (0.60-0.97)               | 19,339 (12,893-20,843)        | 0.90 (0.60-0.97)               |
| <b>Total LTFU (cumulative)</b>                        | <b>28,223</b>                 |                                | <b>37,850</b>                 |                                | <b>44,956</b>                 |                                |
| Estimated with known status                           | 21,167 (20,038-24,272)        | 0.75 (0.71-0.86)               | 28,388 (26,874-32,551)        | 0.75 (0.71-0.86)               | 33,717 (31,919-38,662)        | 0.75 (0.71-0.86)               |
| Estimated deaths                                      | 4445 (4022-6773)              | 0.21 (0.19-0.32)               | 5961 (5394-9084)              | 0.21 (0.19-0.32)               | 7081 (6406-10,789)            | 0.21 (0.19-0.32)               |
| Estimated re-connected to care (unofficial transfers) | 9197 (5184-12,374)            | 0.55 (0.31-0.74)               | 12,335 (6952-16,596)          | 0.55 (0.31-0.74)               | 14,650 (8257-19,711)          | 0.55 (0.31-0.74)               |

|                                                    |                                 |                      |                                |                      |                               |                      |
|----------------------------------------------------|---------------------------------|----------------------|--------------------------------|----------------------|-------------------------------|----------------------|
| Estimated suppressed VL among re-connected to care | 4690 (2575-6622)                | 0.51 (0.28-0.72)     | 6291 (3454-8881)               | 0.51 (0.28-0.72)     | 7472 (4102-10,548)            | 0.51 (0.28-0.72)     |
| <b>Total estimated suppressed VL</b>               | <b>117,708 (79,580-116,654)</b> | <b>78% (52%-86%)</b> | <b>97,793 (65,164-10,8645)</b> | <b>73% (48%-81%)</b> | <b>81,832 (53,831-86,679)</b> | <b>66% (44%-70%)</b> |
| <b>Total non-deaths</b>                            | <b>147,215</b>                  |                      | <b>134,739</b>                 |                      | <b>123,456</b>                |                      |

| <b>West Africa</b>                                    | <b>Year 1</b>                   |                                       | <b>Year 2</b>                   |                                       | <b>Year 3</b>                   |                                       |
|-------------------------------------------------------|---------------------------------|---------------------------------------|---------------------------------|---------------------------------------|---------------------------------|---------------------------------------|
|                                                       | <b>Total (plausible ranges)</b> | <b>Proportions (plausible ranges)</b> | <b>Total (plausible ranges)</b> | <b>Proportions (plausible ranges)</b> | <b>Total (plausible ranges)</b> | <b>Proportions (plausible ranges)</b> |
| <i>Total with suppressed VL</i>                       | <b>1604</b> (1052-1701)         | 0.91 (0.60-0.97)                      | <b>1140</b> (751-1213)          | 0.91 (0.60-0.97)                      | <b>721</b> (472-763)            | 0.92 (0.60-0.97)                      |
| <i>Total with unsuppressed VL</i>                     | <b>150</b>                      |                                       | <b>111</b>                      |                                       | <b>66</b>                       |                                       |
| <i>Total deaths (cumulative)</i>                      | <b>304</b>                      |                                       | <b>320</b>                      |                                       | <b>327</b>                      |                                       |
| <i>Total with No VL</i>                               | <b>1049</b>                     |                                       | <b>842</b>                      |                                       | <b>540</b>                      |                                       |
| Estimated suppressed VL                               | 944 (629-1017)                  | 0.90 (0.60-0.97)                      | 758 (505-817)                   | 0.90 (0.60-0.97)                      | 491 (324-524)                   | 0.91 (0.60-0.97)                      |
| <i>Total transfers (cumulative)</i>                   | <b>76</b>                       |                                       | <b>114</b>                      |                                       | <b>142</b>                      |                                       |
| Estimated deaths                                      | 6 (1-14)                        | 0.08 (0.01-0.18)                      | 11 (1-20)                       | 0.10 (0.01-0.18)                      | 18 (1-26)                       | 0.13 (0.01-0.18)                      |
| Estimated suppressed VL                               | 63 (42-68)                      | 0.90 (0.60-0.97)                      | 93 (62-100)                     | 0.90 (0.60-0.97)                      | 113 (74-120)                    | 0.91 (0.60-0.97)                      |
| <i>Total LTFU (cumulative)</i>                        | <b>2304</b>                     |                                       | <b>2830</b>                     |                                       | <b>3414</b>                     |                                       |
| Estimated with known status                           | 1728 (1636-1981)                | 0.75 (0.71-0.86)                      | 2123 (2009-2434)                | 0.75 (0.71-0.86)                      | 2561 (2424-2936)                | 0.75 (0.71-0.86)                      |
| Estimated deaths                                      | 363 (328-553)                   | 0.21 (0.19-0.32)                      | 446 (403-679)                   | 0.21 (0.19-0.32)                      | 538 (487-820)                   | 0.21 (0.19-0.32)                      |
| Estimated re-connected to care (unofficial transfers) | 751 (423-1010)                  | 0.55 (0.31-0.74)                      | 922 (520-1241)                  | 0.55 (0.31-0.74)                      | 1113 (627-1497)                 | 0.55 (0.31-0.74)                      |
| Estimated suppressed VL among re-connected to care    | 383 (210-541)                   | 0.51 (0.28-0.72)                      | 470 (258-664)                   | 0.51 (0.28-0.72)                      | 568 (312-801)                   | 0.51 (0.28-0.72)                      |
| <b>Total estimated suppressed VL</b>                  | <b>2994 (1933-3327)</b>         | <b>62% (40%-69%)</b>                  | <b>2461 (1576-2794)</b>         | <b>54% (34%-61%)</b>                  | <b>1893 (1182-2208)</b>         | <b>44% (27%-51%)</b>                  |
| <b>Total non-deaths</b>                               | <b>4814</b>                     |                                       | <b>4580</b>                     |                                       | <b>4327</b>                     |                                       |

Adults,  $\geq 18$  years at ART initiation; ART, consists of the combination of at least three antiretrovirals.

Note: Plausible ranges of estimated suppressed VL among re-connected to care were extracted from 95% CI of the tracing study (24).

Abbreviations: IQR, Interquartile range, CCASAnet, Caribbean/Central and South America; NA-ACCORD, The North American AIDS Cohort Collaboration on Research and Design



**Table S4. Comparison of proportions of viral suppression (ITT, among VL measurement and adjusted), LTFU, transfer, mortality and without VL among children/adolescents**

| <b>Year 1<br/>(Children/Adolescents)</b> | <b>VL &lt;1000 copies/mL<br/>(ITT)</b> | <b>VL &lt;1000 copies/mL<br/>(Among PWH with VL<br/>measurements)</b> | <b>VL &lt;1000 copies/mL<br/>(Adjusted)</b> | <b>% LTFU</b> | <b>% Transfer</b> | <b>%<br/>Mortality</b> | <b>% Without<br/>VL testing</b> |
|------------------------------------------|----------------------------------------|-----------------------------------------------------------------------|---------------------------------------------|---------------|-------------------|------------------------|---------------------------------|
| Asia-Pacific                             | 55%                                    | 84%                                                                   | 84%                                         | 1.3%          | 3.1%              | 0.8%                   | 29.8%                           |
| CCASAnet                                 | 58%                                    | 79%                                                                   | 73%                                         | 11.8%         | 2.0%              | 0.8%                   | 11.4%                           |
| Central Africa                           | 43%                                    | 82%                                                                   | 60%                                         | 38.3%         | 0.0%              | 0.6%                   | 8.4%                            |
| East Africa                              | 37%                                    | 74%                                                                   | 65%                                         | 19.2%         | 5.0%              | 3.2%                   | 23.1%                           |
| Southern Africa                          | 35%                                    | 72%                                                                   | 63%                                         | 16.7%         | 9.8%              | 2.4%                   | 23.5%                           |
| West Africa                              | 22%                                    | 66%                                                                   | 48%                                         | 38.7%         | 2.5%              | 8.8%                   | 16.3%                           |
| Overall                                  | 36%                                    | 74%                                                                   | 64%                                         | 18.6%         | 7.2%              | 3.1%                   | 22.8%                           |
| <b>Year 2<br/>(Children/Adolescents)</b> | <b>VL &lt;1000 copies/mL<br/>(ITT)</b> | <b>VL &lt;1000 copies/mL<br/>(Among PWH with VL<br/>measurements)</b> | <b>VL &lt;1000 copies/mL<br/>(Adjusted)</b> | <b>% LTFU</b> | <b>% Transfer</b> | <b>%<br/>Mortality</b> | <b>% Without<br/>VL testing</b> |
| Asia-Pacific                             | 54%                                    | 86%                                                                   | 84%                                         | 3.0%          | 6.9%              | 1.3%                   | 26.3%                           |
| CCASAnet                                 | 47%                                    | 77%                                                                   | 67%                                         | 20.3%         | 3.0%              | 0.8%                   | 14.4%                           |
| Central Africa                           | 25%                                    | 87%                                                                   | 46%                                         | 64.8%         | 0.0%              | 0.6%                   | 5.7%                            |
| East Africa                              | 33%                                    | 74%                                                                   | 60%                                         | 26.9%         | 8.9%              | 4.2%                   | 15.2%                           |
| Southern Africa                          | 27%                                    | 74%                                                                   | 62%                                         | 23.7%         | 16.7%             | 2.7%                   | 19.9%                           |
| West Africa                              | 19%                                    | 67%                                                                   | 44%                                         | 47.4%         | 3.6%              | 9.6%                   | 11.6%                           |
| Overall                                  | 30%                                    | 75%                                                                   | 62%                                         | 25.8%         | 12.4%             | 3.7%                   | 18.2%                           |
| <b>Year 3<br/>(Children/Adolescents)</b> | <b>VL &lt;1000 copies/mL<br/>(ITT)</b> | <b>VL &lt;1000 copies/mL<br/>(Among PWH with VL<br/>measurements)</b> | <b>VL &lt;1000 copies/mL<br/>(Adjusted)</b> | <b>% LTFU</b> | <b>% Transfer</b> | <b>%<br/>Mortality</b> | <b>% Without<br/>VL testing</b> |
| Asia-Pacific                             | 53%                                    | 87%                                                                   | 83%                                         | 5.8%          | 11.9%             | 1.5%                   | 20.0%                           |
| CCASAnet                                 | 38%                                    | 80%                                                                   | 61%                                         | 33.5%         | 3.1%              | 0.9%                   | 14.3%                           |
| Central Africa                           | 0%                                     | 0%                                                                    | 0%                                          | NA            | NA                | NA                     | NA                              |
| East Africa                              | 29%                                    | 76%                                                                   | 57%                                         | 35.0%         | 13.2%             | 5.5%                   | 7.8%                            |
| Southern Africa                          | 21%                                    | 75%                                                                   | 59%                                         | 30.2%         | 22.8%             | 3.0%                   | 15.6%                           |
| West Africa                              | 13%                                    | 64%                                                                   | 37%                                         | 57.1%         | 4.9%              | 10.3%                  | 7.9%                            |
| Overall                                  | 24%                                    | 76%                                                                   | 59%                                         | 33.1%         | 17.5%             | 4.2%                   | 13.2%                           |

**Table S5. Comparison of proportions of viral suppression (ITT, among VL measurement and adjusted), LTFU, transfer, mortality and without VL among adults**

| <b>Year 1<br/>(Adults)</b> | <b>VL &lt;1000 copies/mL<br/>(ITT)</b> | <b>VL &lt;1000 copies/mL<br/>(Among PWH with VL<br/>measurements)</b> | <b>VL &lt;1000 copies/mL<br/>(Adjusted)</b> | <b>% LTFU</b> | <b>% Transfer</b> | <b>% Mortality</b> | <b>% Without<br/>VL testing</b> |
|----------------------------|----------------------------------------|-----------------------------------------------------------------------|---------------------------------------------|---------------|-------------------|--------------------|---------------------------------|
| Asia-Pacific               | 46%                                    | 94%                                                                   | 90%                                         | 5.7%          | 2.1%              | 3.0%               | 40.3%                           |
| CCASAnet                   | 65%                                    | 91%                                                                   | 84%                                         | 10.9%         | 0.5%              | 3.0%               | 13.7%                           |
| NA-ACCORD                  | 69%                                    | 88%                                                                   | 80%                                         | 13.2%         | 0.0%              | 2.3%               | 5.5%                            |
| Central Africa             | 42%                                    | 91%                                                                   | 62%                                         | 45.3%         | 0.0%              | 1.2%               | 7.9%                            |
| East Africa                | 44%                                    | 90%                                                                   | 75%                                         | 23.0%         | 4.3%              | 4.2%               | 19.8%                           |
| Southern Africa            | 42%                                    | 88%                                                                   | 78%                                         | 18.1%         | 9.1%              | 2.6%               | 22.6%                           |
| West Africa                | 29%                                    | 91%                                                                   | 62%                                         | 42.0%         | 1.4%              | 5.5%               | 19.1%                           |
| Overall                    | 44%                                    | 89%                                                                   | 79%                                         | 19.4%         | 6.9%              | 3.0%               | 20.8%                           |
| <b>Year 2<br/>(Adults)</b> | <b>VL &lt;1000 copies/mL<br/>(ITT)</b> | <b>VL &lt;1000 copies/mL<br/>(Among PWH with VL<br/>measurements)</b> | <b>VL &lt;1000 copies/mL<br/>(Adjusted)</b> | <b>% LTFU</b> | <b>% Transfer</b> | <b>% Mortality</b> | <b>% Without<br/>VL testing</b> |
| Asia-Pacific               | 42%                                    | 97%                                                                   | 90%                                         | 10.7%         | 3.2%              | 3.9%               | 38.6%                           |
| CCASAnet                   | 58%                                    | 90%                                                                   | 78%                                         | 19.1%         | 1.2%              | 4.0%               | 11.4%                           |
| NA-ACCORD                  | 60%                                    | 88%                                                                   | 74%                                         | 22.6%         | 0.0%              | 3.8%               | 5.8%                            |
| Central Africa             | 23%                                    | 94%                                                                   | 42%                                         | 71.0%         | 0.0%              | 1.6%               | 2.8%                            |
| East Africa                | 37%                                    | 90%                                                                   | 68%                                         | 33.2%         | 7.3%              | 5.6%               | 13.2%                           |
| Southern Africa            | 33%                                    | 89%                                                                   | 73%                                         | 25.8%         | 14.3%             | 3.4%               | 19.0%                           |
| West Africa                | 21%                                    | 91%                                                                   | 54%                                         | 52.8%         | 2.1%              | 6.0%               | 15.7%                           |
| Overall                    | 36%                                    | 89%                                                                   | 72%                                         | 27.9%         | 11.2%             | 4.0%               | 16.9%                           |
| <b>Year 3<br/>(Adults)</b> | <b>VL &lt;1000 copies/mL<br/>(ITT)</b> | <b>VL &lt;1000 copies/mL<br/>(Among PWH with VL<br/>measurements)</b> | <b>VL &lt;1000 copies/mL<br/>(Adjusted)</b> | <b>% LTFU</b> | <b>% Transfer</b> | <b>% Mortality</b> | <b>% Without<br/>VL testing</b> |
| Asia-Pacific               | 47%                                    | 97%                                                                   | 87%                                         | 13.9%         | 4.5%              | 4.7%               | 28.5%                           |
| CCASAnet                   | 50%                                    | 90%                                                                   | 71%                                         | 28.8%         | 1.6%              | 5.0%               | 9.5%                            |
| NA-ACCORD                  | 52%                                    | 89%                                                                   | 69%                                         | 31.3%         | 0.0%              | 5.2%               | 4.7%                            |
| Central Africa             | NA                                     | NA                                                                    | NA                                          | NA            | NA                | NA                 | NA                              |

|                 |     |     |     |       |       |      |       |
|-----------------|-----|-----|-----|-------|-------|------|-------|
| East Africa     | 29% | 91% | 59% | 44.3% | 10.5% | 7.2% | 6.5%  |
| Southern Africa | 27% | 89% | 66% | 32.6% | 18.7% | 4.1% | 14.3% |
| West Africa     | 14% | 92% | 44% | 65.5% | 2.7%  | 6.3% | 10.4% |
| Overall         | 29% | 90% | 65% | 36.0% | 15.0% | 4.8% | 12.2% |

**Figure S1. Sensitivity analysis of the overall viral suppression of adults by varying  $\pm 25\%$  in the estimated viral suppression among those LTFU who reconnected to care**

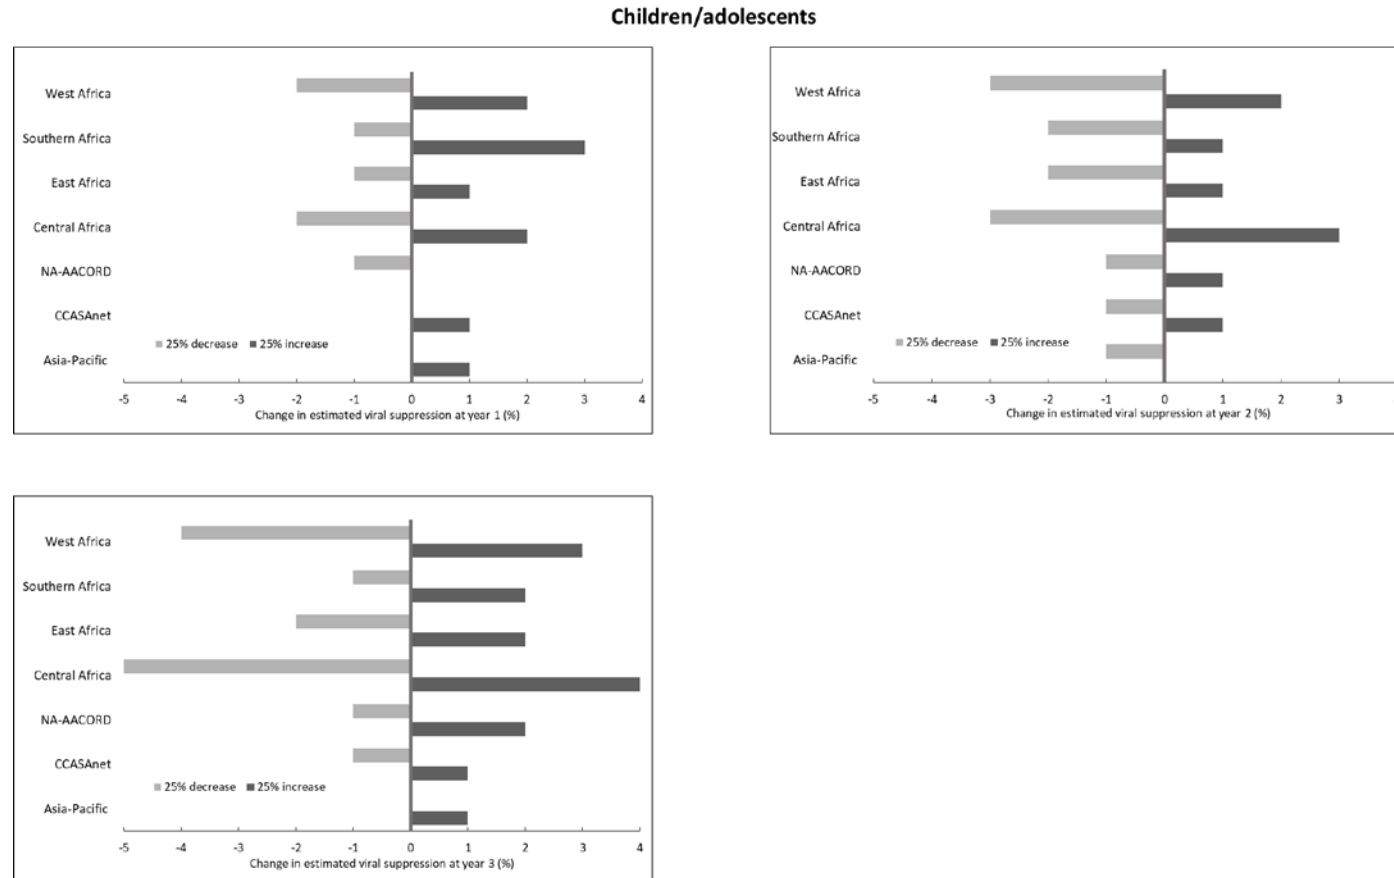

The estimated proportion of viral suppression among those who reconnected to care was 0.51 in the main adjusted analysis in children/adolescents. In the sensitivity analysis provided in the figure above, the upper bound (high) and lower bound (low) for the viral suppression proportions were applied as a 25% increase and decrease, respectively. For example, at year 3 after ART initiation, a 25% increase and a 25% decrease from the estimate used in the main analysis for viral suppression proportion among PWH reconnected to care for LTFU adults for Southern Africa would respectively result in a 2% increase and a 1% decrease in overall viral suppression estimates in the region.

**Figure S2. Sensitivity analysis of the overall viral suppression of adults by varying  $\pm 25\%$  in the estimated viral suppression among those LTFU who reconnected to care**

**Adults**

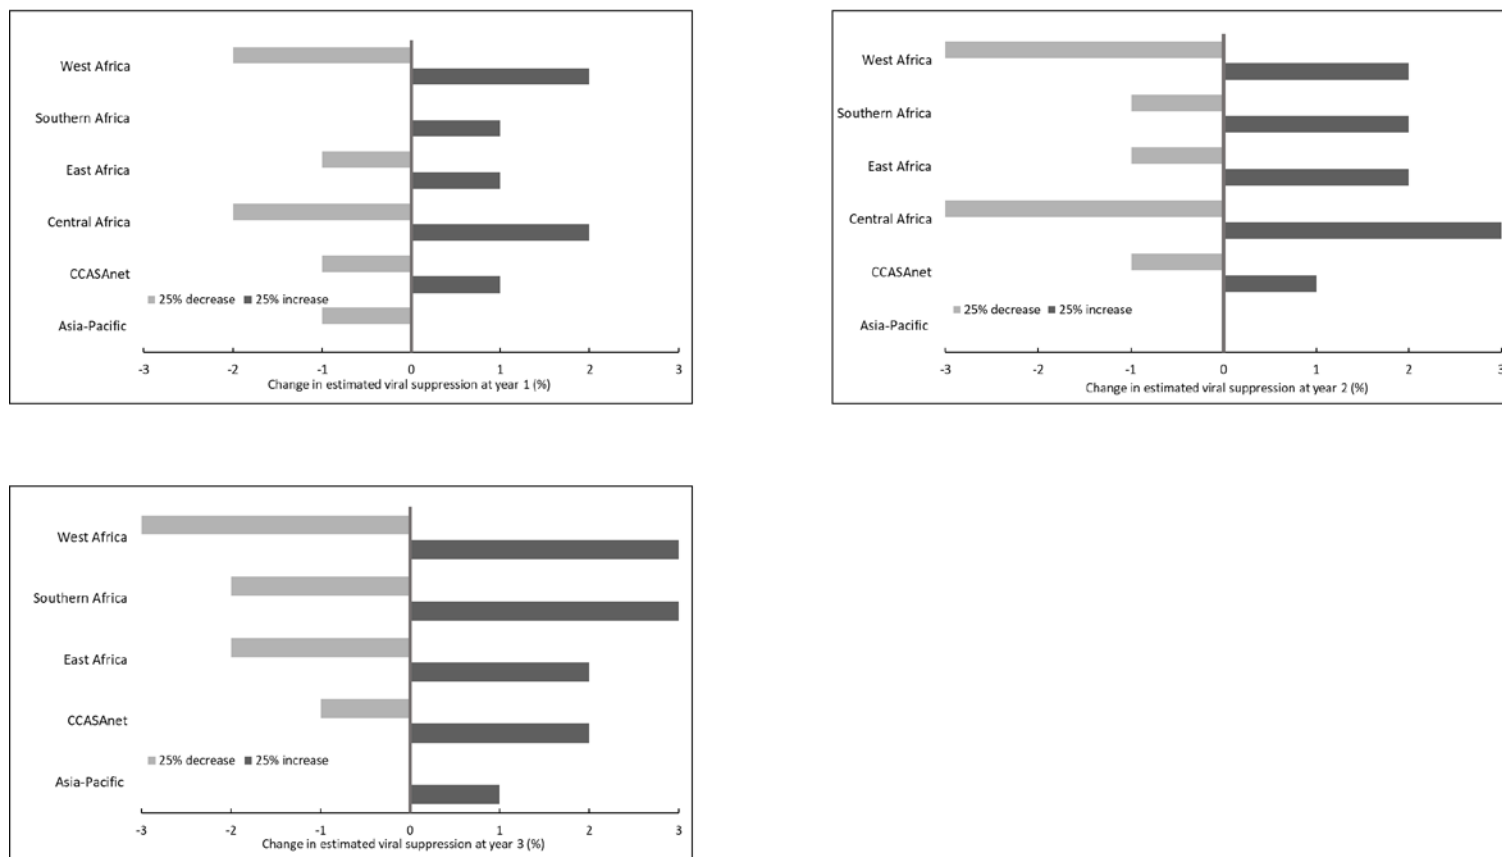

The estimated viral suppression proportion among those who reconnected to care was estimated as 0.51 in the main adjusted analysis in adults. In the sensitivity analysis provided in the figure above, the upper bound (high) and lower bound (low) for the viral suppression proportion were applied as a 25% increase and decrease, respectively. For example, at year 3 after ART initiation, a 25% increase and 25% decrease from the estimate used in the main analysis for viral suppression proportions among PWH reconnected to care for LTFU adults for Southern Africa would result in a 3% increase and 2% decrease in overall viral suppression estimates in the region.

**Figure S3. HIV viral suppression and treatment outcomes for children/adolescents with HIV in the IeDEA global consortium by region at years 1, 2, and 3 following ART initiation**

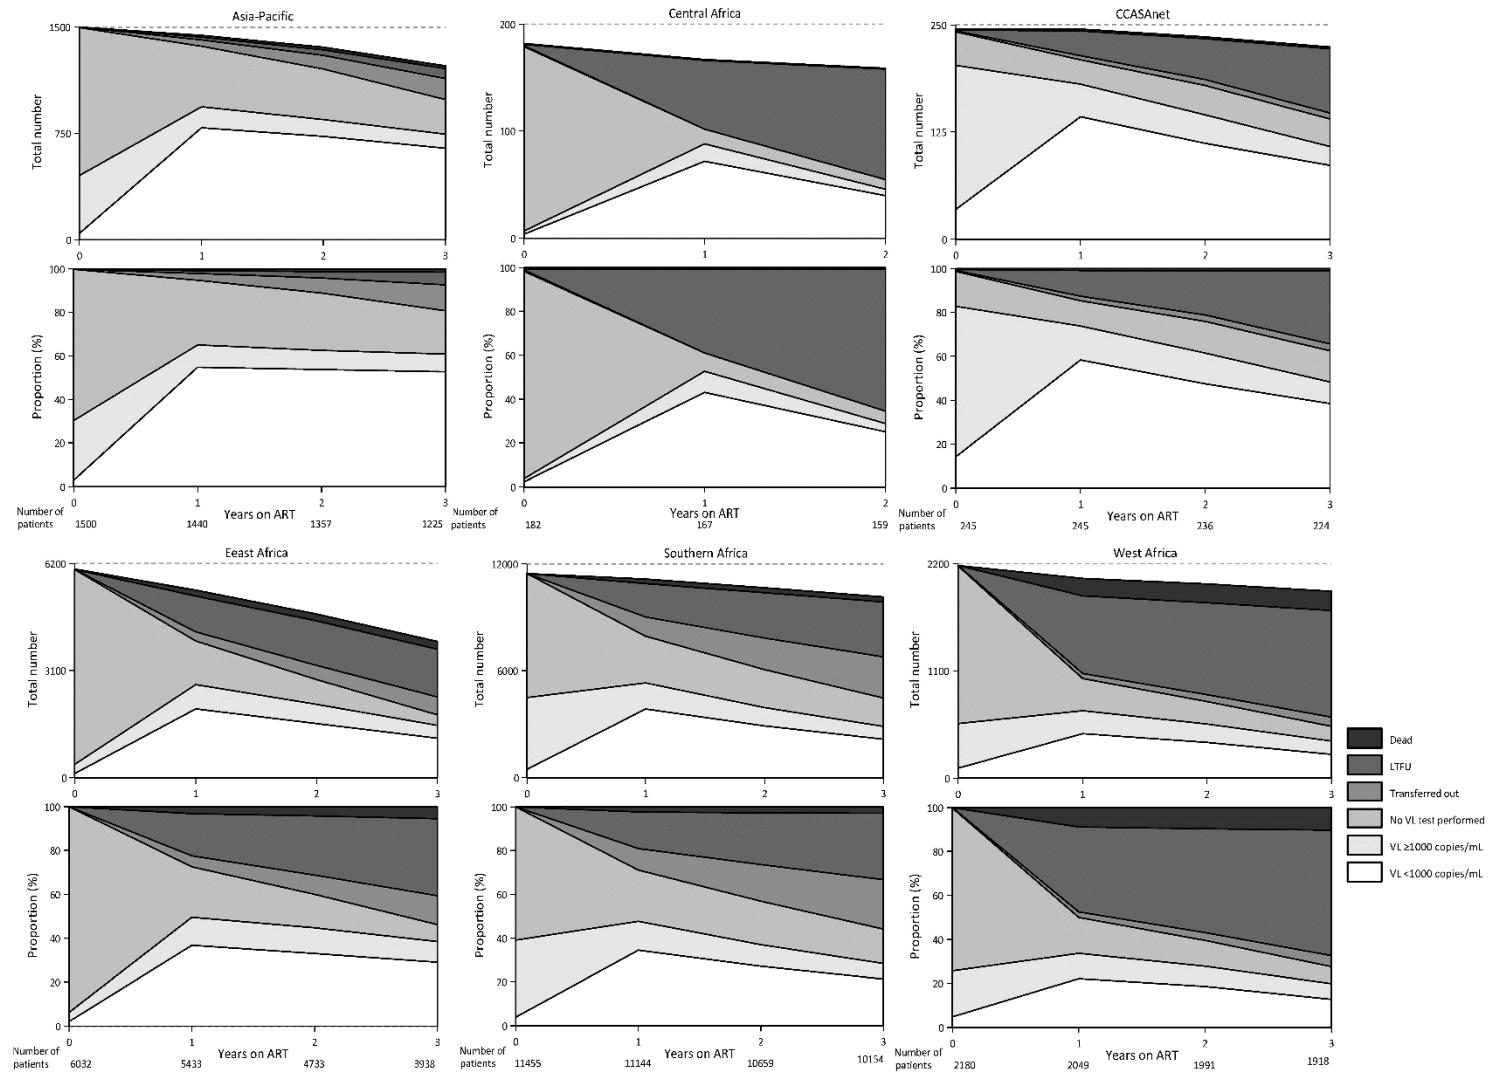

**Figure S4. HIV viral suppression and treatment outcomes for adults with HIV in the IeDEA global consortium by region at years 1, 2, and 3 following ART initiation**

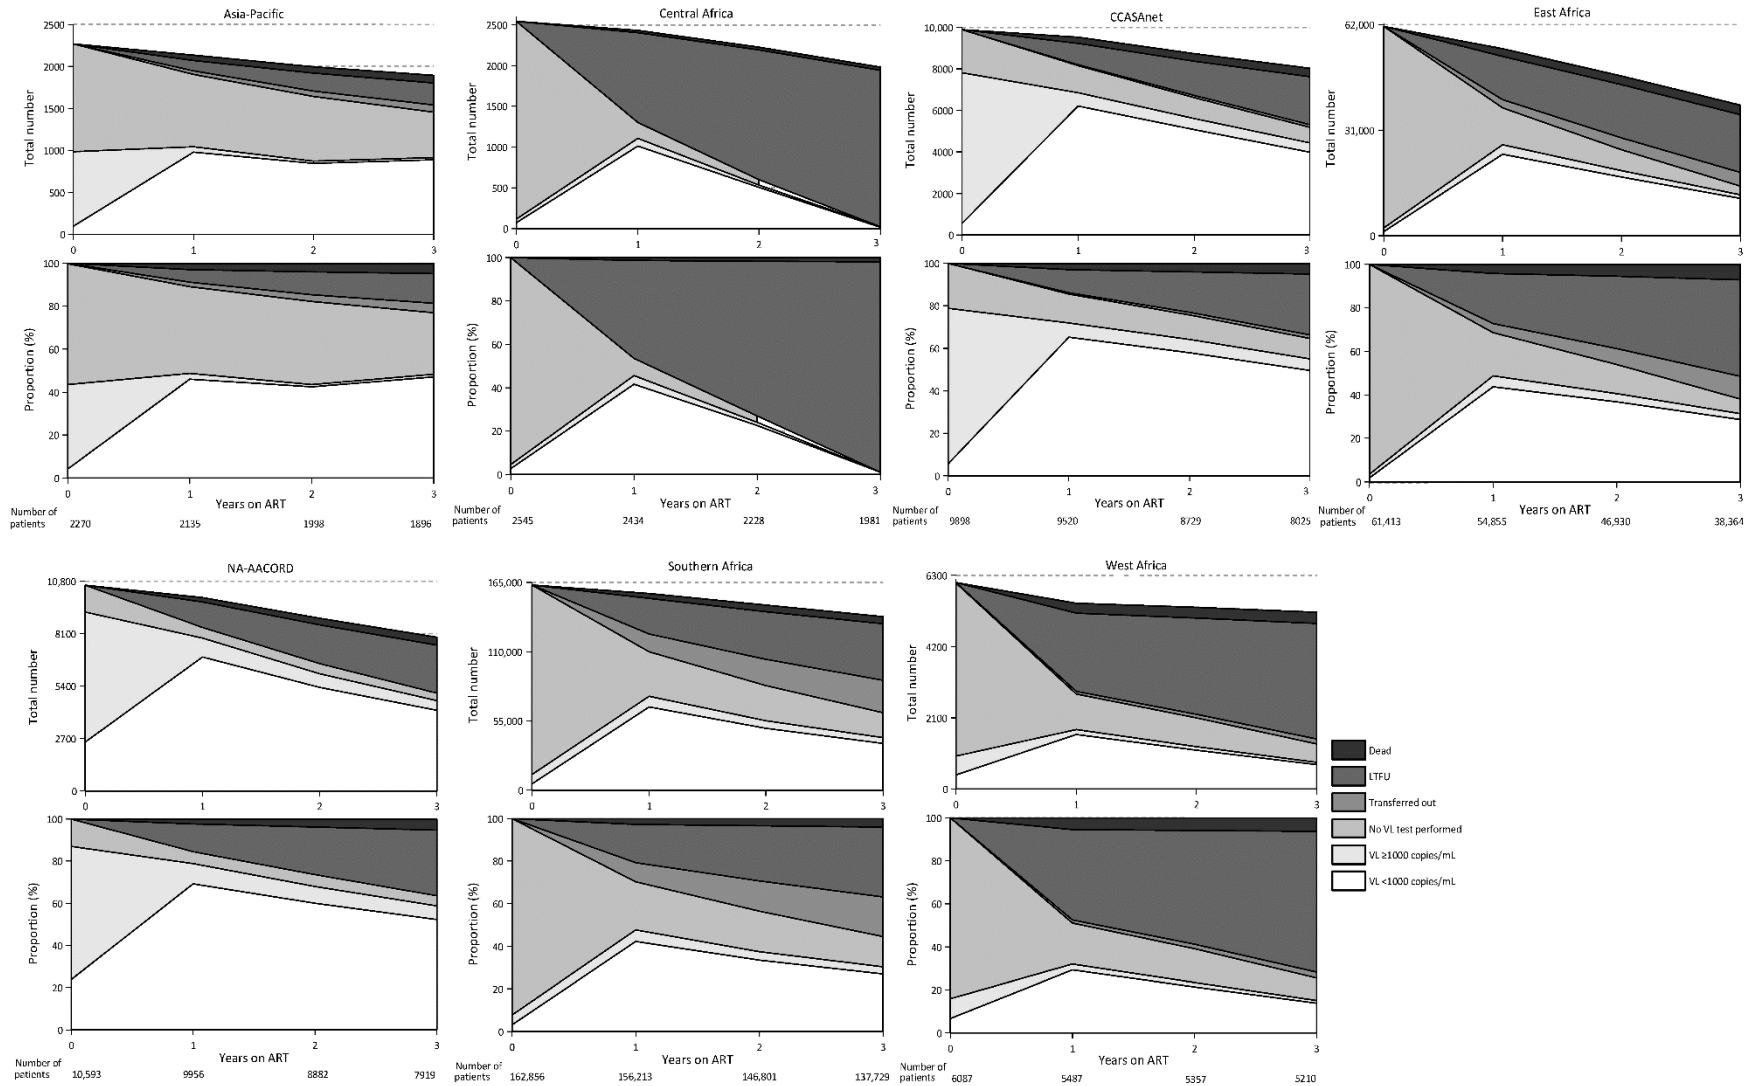

## References

1. Teeraananchai S, Bunupuradah T, Puthanakit T, Kerr SJ, Ruxrungtham K, Chaivooth S, et al. First-Line Antiretroviral Treatment Outcomes and Durability in HIV-Infected Children Treated Through the Universal Coverage Health Program in Thailand. *J Acquir Immune Defic Syndr*. 2017;75(2):219-25.
2. Tanuma J, Matsumoto S, Haneuse S, Cuong DD, Vu TV, Thuy PTT, et al. Long-term viral suppression and immune recovery during first-line antiretroviral therapy: a study of an HIV-infected adult cohort in Hanoi, Vietnam. *J Int AIDS Soc*. 2017;20(4).
3. A Decade of Combination Antiretroviral Treatment in Asia: The TREAT Asia HIV Observational Database Cohort. *AIDS research and human retroviruses*. 2016;32(8):772-81.
4. Cruz ML, Cardoso CA, Darmont MQ, Souza E, Andrade SD, D'Al Fabbro MM, et al. Viral suppression and adherence among HIV-infected children and adolescents on antiretroviral therapy: results of a multicenter study. *J Pediatr (Rio J)*. 2014;90(6):563-71.
5. Meireles MV, Pascom ARP, Duarte EC, McFarland W. Comparative effectiveness of first-line antiretroviral therapy: results from a large real-world cohort after the implementation of dolutegravir. *Aids*. 2019;33(10):1663-8.
6. Wolff MJ, Giganti MJ, Cortes CP, Cahn P, Grinsztejn B, Pape JW, et al. A decade of HAART in Latin America: Long term outcomes among the first wave of HIV patients to receive combination therapy. *PLoS One*. 2017;12(6):e0179769.
7. Boulle A, Schomaker M, May MT, Hogg RS, Shepherd BE, Monge S, et al. Mortality in patients with HIV-1 infection starting antiretroviral therapy in South Africa, Europe, or North America: a collaborative analysis of prospective studies. *PLoS Med*. 2014;11(9):e1001718.
8. Bhagwat P, Kapadia SN, Ribaud HJ, Gulick RM, Currier JS. Racial Disparities in Virologic Failure and Tolerability During Firstline HIV Antiretroviral Therapy. *Open Forum Infect Dis*. 2019;6(2):ofz022.
9. Salou M, Dagnra AY, Butel C, Vidal N, Serrano L, Takassi E, et al. High rates of virological failure and drug resistance in perinatally HIV-1-infected children and adolescents receiving lifelong antiretroviral therapy in routine clinics in Togo. *J Int AIDS Soc*. 2016;19(1):20683.
10. Kwarisiima D, Kanya MR, Owaraganise A, Mwangwa F, Byonanebye DM, Ayieko J, et al. High rates of viral suppression in adults and children with high CD4+ counts using a streamlined ART delivery model in the SEARCH trial in rural Uganda and Kenya. *J Int AIDS Soc*. 2017;20(Suppl 4):21673.
11. Tsondai PR, Wilkinson LS, Grimsrud A, Mdlalo PT, Ullauri A, Boulle A. High rates of retention and viral suppression in the scale-up of antiretroviral therapy adherence clubs in Cape Town, South Africa. *Journal of the International AIDS Society*. 2017;20(Suppl 4):21649-.
12. Boullé C, Kouanfack C, Laborde-Balen G, Boyer S, Aghokeng AF, Carrieri MP, et al. Gender Differences in Adherence and Response to Antiretroviral Treatment in the Stratall Trial in Rural District Hospitals in Cameroon. *J Acquir Immune Defic Syndr*. 2015;69(3):355-64.
13. Sohn AH, Lumbiganon P, Kurniati N, Lapphra K, Law M, Do VC, et al. Determining standardized causes of death of infants, children, and adolescents living with HIV in Asia. *Aids*. 2020;34(10):1527-37.
14. Alvarez-Uria G. Description of the cascade of care and factors associated with attrition before and after initiating antiretroviral therapy of HIV infected children in a cohort study in India. *PeerJ*. 2014;2:e304.
15. Rahmalia A, Price MH, Hartantri Y, Alisjahbana B, Wisaksana R, van Crevel R, et al. Are there differences in HIV retention in care between female and male patients in



- Indonesia? A multi-state analysis of a retrospective cohort study. *PloS one*. 2019;14(6):e0218781-e.
16. Luque MT, Jenkins CA, Shepherd BE, Padgett D, Rouzier V, Succi RCM, et al. Mortality in Children with Human Immunodeficiency Virus Initiating Treatment: A Six-Cohort Study in Latin America. *J Pediatr*. 2017;182:245-52.e1.
  17. Carriquiry G, Fink V, Koethe JR, Giganti MJ, Jayathilake K, Blevins M, et al. Mortality and loss to follow-up among HIV-infected persons on long-term antiretroviral therapy in Latin America and the Caribbean. *Journal of the International AIDS Society*. 2015;18(1):20016-.
  18. McHugh G, Simms V, Dauya E, Bandason T, Chonzi P, Metaxa D, et al. Clinical outcomes in children and adolescents initiating antiretroviral therapy in decentralized healthcare settings in Zimbabwe. *J Int AIDS Soc*. 2017;20(1):21843.
  19. Andargie AA, Asmleash Y. Survival time of human immunodeficiency virus (HIV) infected children under 15 years of age after initiation of antiretroviral therapy in the University of Gondar Comprehensive Specialized Hospital, Ethiopia. *Journal of AIDS and HIV Research*. 2018;10(4):49-55.
  20. Holmes CB, Sikazwe I, Sikombe K, Eshun-Wilson I, Czaicki N, Beres LK, et al. Estimated mortality on HIV treatment among active patients and patients lost to follow-up in 4 provinces of Zambia: Findings from a multistage sampling-based survey. *PLoS Med*. 2018;15(1):e1002489.
  21. Peterson I, Togun O, de Silva T, Oko F, Rowland-Jones S, Jaye A, et al. Mortality and immunovirological outcomes on antiretroviral therapy in HIV-1 and HIV-2-infected individuals in the Gambia. *Aids*. 2011;25(17):2167-75.
  22. Geng EH, Odeny TA, Lyamuya RE, Nakiwogga-Muwanga A, Diero L, Bwana M, et al. Estimation of mortality among HIV-infected people on antiretroviral treatment in East Africa: a sampling based approach in an observational, multisite, cohort study. *The lancet HIV*. 2015;2(3):e107-e16.
  23. Rachlis B, Ochieng D, Geng E, Rotich E, Ochieng V, Maritim B, et al. Implementation and operational research: evaluating outcomes of patients lost to follow-up in a large comprehensive care treatment program in western Kenya. *Journal of acquired immune deficiency syndromes (1999)*. 2015;68(4):e46-e55.
  24. Sikazwe I, Eshun-Wilson I, Sikombe K, Czaicki N, Somwe P, Mody A, et al. Retention and viral suppression in a cohort of HIV patients on antiretroviral therapy in Zambia: Regionally representative estimates using a multistage-sampling-based approach. *PLoS Med*. 2019;16(5):e1002811.

## APPENDIX

### IeDEA GLOBAL INVESTIGATOR ACKNOWLEDGEMENTS BY REGION

#### Asia-Pacific

##### Funding acknowledgement

The TREAT Asia HIV Observational Database is an initiative of TREAT Asia, a program of amfAR, The Foundation for AIDS Research, with support from the U.S. National Institutes of Health's National Institute of Allergy and Infectious Diseases, the *Eunice Kennedy Shriver* National Institute of Child Health and Human Development, the National Cancer Institute, the National Institute of Mental Health, the National Institute on Drug Abuse, the National Heart, Lung, and Blood Institute, the National Institute on Alcohol Abuse and Alcoholism, the National Institute of Diabetes and Digestive and Kidney Diseases, and the Fogarty International Center, as part of the International Epidemiology Databases to Evaluate AIDS (IeDEA; U01AI069907). The Kirby Institute is funded by the Australian Government Department of Health and Ageing, and is affiliated with the Faculty of Medicine, UNSW Sydney. The content of this publication is solely the responsibility of the authors and does not necessarily represent the official views of any of the governments or institutions mentioned above.

##### Acknowledgements List

##### Site investigators and study teams:

**The TREAT Asia HIV Observational Database:** PS Ly, V Khol, National Center for HIV/AIDS, Dermatology & STDs, Phnom Penh, Cambodia; FJ Zhang, HX Zhao, N Han, Beijing Ditan Hospital, Capital Medical University, Beijing, China; MP Lee, PCK Li, TS Kwong, TH Li, Queen Elizabeth Hospital, Hong Kong SAR, China; N Kumarasamy, C Ezhilarasi, Chennai Antiviral Research and Treatment Clinical Research Site (CART CRS), VHS-Infectious Diseases Medical Centre, VHS, Chennai, India; S Pujari, K Joshi, S Gaikwad, A Chitalikar, Institute of Infectious Diseases, Pune, India; TP Merati, DN Wirawan, F Yuliana, Faculty of Medicine Udayana University & Sanglah Hospital, Bali, Indonesia; E Yuniastuti, A Widhani, S Maria, TH Karjadi, Faculty of Medicine Universitas Indonesia - Dr. Cipto Mangunkusumo General Hospital, Jakarta, Indonesia; J Tanuma, S Oka, T Nishijima, National Center for Global Health and Medicine, Tokyo, Japan; JY Choi, Na S, JM Kim, Division of Infectious Diseases, Department of Internal Medicine, Yonsei University College of Medicine, Seoul, South Korea; YM Gani, NB Rudi, Hospital Sungai Buloh, Sungai Buloh, Malaysia; I Azwa, A Kamarulzaman, SF Syed Omar, S Ponnampalavanar, University Malaya Medical Centre, Kuala Lumpur, Malaysia; R Ditangco, MK Pasayan, ML Mationg, Research Institute for Tropical Medicine, Muntinlupa City, Philippines; YJ Chan, WW Ku, E Ke, PC Wu, Taipei Veterans General Hospital, Taipei, Taiwan; OT Ng, PL Lim, LS Lee, T Yap, Tan Tock Seng Hospital, Singapore; A

Avihingsanon, S Gatechompol, P Phanuphak, C Phadungphon, HIV-NAT/Thai Red Cross AIDS Research Centre, Bangkok, Thailand; S Kiertiburanakul, A Phuphuakrat, L Chumla, N Sanmeema, Faculty of Medicine Ramathibodi Hospital, Mahidol University, Bangkok, Thailand; R Chaiwarith, T Sirisanthana, J Praparattanapan, K Nuket, Research Institute for Health Sciences, Chiang Mai, Thailand; S Khuwuan, P Kantipong, P Kambua, Chiangrai Prachanukroh Hospital, Chiang Rai, Thailand; KV Nguyen, HV Bui, DTH Nguyen, DT Nguyen, National Hospital for Tropical Diseases, Hanoi, Vietnam; CD Do, AV Ngo, LT Nguyen, Bach Mai Hospital, Hanoi, Vietnam; AH Sohn, JL Ross, B Petersen, TREAT Asia, amfAR - The Foundation for AIDS Research, Bangkok, Thailand; MG Law, A Jiamsakul, D Rupasinghe, The Kirby Institute, UNSW Sydney, NSW, Australia.

**The TREAT Asia Pediatric HIV Observational Database:** PS Ly, V Khol, National Centre for HIV/AIDS, Dermatology and STDs, Phnom Penh, Cambodia; J Tucker, New Hope for Cambodian Children, Phnom Penh, Cambodia; N Kumarasamy, E Chandrasekaran, Chennai Antiviral Research and Treatment Clinical Research Site (CART CRS), VHS-Infectious Diseases Medical Centre, VHS, Chennai, India; A Kinikar, V Mave, S Nimkar, I Marbaniang, BJ Medical College and Sassoon General Hospitals, Maharashtra, India; DK Wati, D Vedaswari, IB Ramajaya, Sanglah Hospital, Udayana University, Bali, Indonesia; N Kurniati, D Muktiarti, Cipto Mangunkusumo – Faculty of Medicine Universitas Indonesia, Jakarta, Indonesia; SM Fong, M Lim, F Daut, Hospital Likas, Kota Kinabalu, Malaysia; NK Nik Yusoff, P Mohamad, Hospital Raja Perempuan Zainab II, Kelantan, Malaysia; TJ Mohamed, MR Drawis, Department of Pediatrics, Women and Children Hospital Kuala Lumpur, Kuala Lumpur, Malaysia; R Nallusamy, KC Chan, Penang Hospital, Penang, Malaysia; T Sudjaritruk, V Sirisanthana, L Aurpibul, Department of Pediatrics, Faculty of Medicine, and Research Institute for Health Sciences, Chiang Mai University, Chiang Mai, Thailand; P Ounchanum, R Hansudewechakul, S Denjanta, A Kongphonoi, Chiangrai Prachanukroh Hospital, Chiang Rai, Thailand; P Lumbiganon, P Kosalaraksa, P Tharnprisan, T Udomphanit, Division of Infectious Diseases, Department of Pediatrics, Faculty of Medicine, Khon Kaen University, Khon Kaen, Thailand; G Jourdain, PHPT-IRD UMI 174 (Institut de recherche pour le développement and Chiang Mai University), Chiang Mai, Thailand; T Puthanakit, S Anugulruengkit, W Jantarabenjakul, R Nadsasarn, Department of Pediatrics and Center of Excellence for Pediatric Infectious Diseases and Vaccines, Faculty of Medicine, Chulalongkorn University, Bangkok, Thailand; K Chokephaibulkit, K Lapphra, W Phongsamart, S Sricharoenchai, Department of Pediatrics, Faculty of Medicine Siriraj Hospital, Mahidol University, Bangkok, Thailand; KH Truong, QT Du, CH Nguyen, Children's Hospital 1, Ho Chi Minh City, Vietnam; VC Do, TM Ha, VT An Children's Hospital 2, Ho Chi Minh City, Vietnam; LV Nguyen, DTK Khu, AN Pham, LT Nguyen, National Hospital of Pediatrics, Hanoi, Vietnam; ON Le, Worldwide Orphans Foundation, Ho Chi Minh City, Vietnam; AH Sohn, JL Ross, T Suwanlerk, TREAT Asia/amfAR - The Foundation for AIDS Research, Bangkok, Thailand; MG Law, A Kariminia, The Kirby Institute, UNSW Sydney, NSW, Australia.

# CCASAnet

## Funding acknowledgement

This work was supported by the NIH-funded Caribbean, Central and South America network for HIV epidemiology (CCASAnet), a member cohort of the International Epidemiologic Databases to Evaluate AIDS (IeDEA) (U01AI069923). The content is solely the responsibility of the authors and does not necessarily represent the official views of the National Institutes of Health. This award is funded by the following institutes: the National Institute of Allergy and Infectious Diseases (NIAID), the *Eunice Kennedy Shriver* National Institute of Child Health and Human Development (NICHD), the National Cancer Institute (NCI), the National Institute of Mental Health (NIMH), the National Institute on Drug Abuse (NIDA), the National Heart, Lung, and Blood Institute (NHLBI), the National Institute on Alcohol Abuse and Alcoholism (NIAAA), the National Institute of Diabetes and Digestive and Kidney Diseases (NIDDK), the Fogarty International Center (FIC), and the National Library of Medicine (NLM).”

## Acknowledgements List

### Site Investigators and Study Team

**Fundación Huésped, Argentina:** Pedro Cahn, Carina Cesar, Valeria Fink, Omar Sued, Emanuel Dell’Isola, Hector Perez, Jose Valiente, Cleyton Yamamoto.

**Instituto Nacional de Infectologia-Fiocruz, Brazil:** Beatriz Grinsztejn, Valdilea Veloso, Paula Luz, Raquel de Boni, Sandra Cardoso Wagner, Ruth Friedman, Ronaldo Moreira.

**Universidade Federal de Minas Gerais, Brazil:** Jorge Pinto, Flavia Ferreira, Marcelle Maia.

**Universidade Federal de São Paulo, Brazil:** Regina Célia de Menezes Succi, Daisy Maria Machado, Aida de Fátima Barbosa Gouvêa.

**Fundación Arriarán, Chile:** Marcelo Wolff, Claudia Cortes, Maria Fernanda Rodriguez, Gladys Allendes.

**Les Centres GHESKIO, Haiti:** Jean William Pape, Vanessa Rouzier, Adias Marcelin, Christian Perodin.

**Hospital Escuela Universitario, Honduras:** Marco Tulio Luque.

**Instituto Hondureño de Seguridad Social, Honduras:** Denis Padgett.

**Instituto Nacional de Ciencias Médicas y Nutrición Salvador Zubirán, Mexico:** Juan Sierra Madero, Brenda Crabtree Ramirez, Paco Belaunzaran, Yanink Caro Vega.

**Instituto de Medicina Tropical Alexander von Humboldt, Peru:** Eduardo Gotuzzo, Fernando Mejia, Gabriela Carriquiry.

**Vanderbilt University Medical Center, USA:** Catherine C McGowan, Bryan E Shepherd, Timothy Sterling, Karu Jayathilake, Anna K Person, Peter F Rebeiro, Jessica Castilho, Stephany N Duda, Fernanda Maruri, Hilary Vansell, Cathy Jenkins, Ahra Kim, Sarah Lotspeich.

## Central Africa (CA-IeDEA)

### Funding acknowledgement

Research reported in this publication was supported by the National Institutes of Health's National Institute of Allergy and Infectious Diseases (NIAID), the *Eunice Kennedy Shriver* National Institute of Child Health & Human Development (NICHD), the National Cancer Institute (NCI), the National Institute on Drug Abuse (NIDA), the National Heart, Lung, and Blood Institute (NHLBI), the National Institute on Alcohol Abuse and Alcoholism (NIAAA), the National Institute of Diabetes and Digestive and Kidney Diseases (NIDDK), the Fogarty International Center (FIC), the National Library of Medicine (NLM), and the Office of the Director (OD) under Award Number U01AI096299 (Central Africa-IeDEA). The content is solely the responsibility of the authors and does not necessarily represent the official views of the National Institutes of Health.

### Acknowledgements List

#### Site investigators and cohorts:

Nimbona Pélagie, Association Nationale de Soutien aux Séropositifs et Malade du Sida (ANSS), Burundi; Patrick Gateretse, Jeanine Munezero, Valentin Nitereka, Théodore Niyongabo, Christelle Twizere, Centre National de Référence en Matière de VIH/SIDA, Burundi; Hélène Bukuru, Thierry Nahimana, Centre de Prise en Charge Ambulatoire et Multidisciplinaire des PVVIH/SIDA du Centre Hospitalo-Universitaire de Kamenge (CPAMP-CHUK), Burundi; Elysée Baransaka, Patrice Barasukana, Eugene Kabanda, Martin Manirakiza, François Ndikumwenayo, CHUK/Burundi National University, Burundi; Jérémie Biziragusenyuka, Ange Marie Michelline Munezero, Centre de Prise en Charge Ambulatoire et Multidisciplinaire des PVVIH/SIDA de l'Hôpital Prince Régent Charles (CPAMP-HPRC), Burundi; Denis Nsame Nforiwe, Bamenda Hospital, Cameroon; Rogers Ajeh, Marc Lionel Ngamani, Clinical Research Education and Consultancy (CRENC), Cameroon; Anastase Dzudie, CRENC and Douala General Hospital, Cameroon; Akindeh Mbuh, CRENC and University of Yaoundé, Cameroon; Djenabou Amadou, Eric Walter Pefura Yone, Jamot Hospital, Cameroon; Ernestine Kendowo, Limbe Regional Hospital, Cameroon; Catherine Akele, Akili Clever, Faustin Kitetele, Patricia Lelo, Martine Tabala, Kalembelembe Pediatric Hospital, Democratic Republic of Congo; Cherubin Ekembe, Didine Kaba, Kinshasa School of Public Health, Democratic Republic of Congo; Merlin Diafouka, Martin Herbas Ekat, Dominique Mahambou Nsonde, CTA Brazzaville, Republic of Congo; Adolphe Mafoua, Massamba Ndala Christ, CTA Pointe-Noire, Republic of Congo; Jules Igirimbabazi, Nicole Ayinkamiye, Bethsaida Health Center, Rwanda; Providance Uwineza, Emmanuel Ndamijimana, Busanza Health Center, Rwanda; Emmanuel Habarurema, Marie Luise Nyiraneza, Gahanga Health Center, Rwanda; Marie Louise Nyiransabimana, Liliane Tuyisenge,

Gikondo Health Center, Rwanda; Christian Shyaka, Catherine Kankindi, Kabuga Health Center, Rwanda; Bonheur Uwakijijwe, Marie Grace Ingabire, Kicukiro Health Center, Rwanda; Jules Ndumuhire, Marie Goretti Nyirabahutu, Masaka Health Center, Rwanda; Fred Muyango, Jean Christophe Bihibindi, Nyagasambu Health Center, Rwanda; Oliver Uwamahoro, Yvette Ndoli, Nyarugunga Health Center, Rwanda; Sabin Nsanzimana, Placidie Mugwaneza, Eric Remera, Esperance Umumararungu, Gallican Nshogoza Rwibasira, Dominique Savio Habimana, Rwanda Biomedical Center, Rwanda; Josephine Gasana, Faustin Kanyabwisha, Gallican Kubwimana, Benjamin Muhoza, Athanase Munyaneza, Gad Murenzi, Francoise Musabyimana, Francine Umwiza, Charles Ingabire, Patrick Tuyisenge, Alex M. Butera, Jules Kabahizi, Ephrem Rurangwa, Rwanda Military Hospital, Rwanda; Rosine Feza, Eugenie Mukashyaka, Shyorongi Health Center, Rwanda; Chantal Benekigeri, Jacqueline Musaninyange, WE-ACTx Health Center, Rwanda.

### **Coordinating and Data Centers:**

Adebola Adedimeji, Kathryn Anastos, Madeline Dilorenzo, Lynn Murchison, Jonathan Ross, Marcel Yotebieng, Albert Einstein College of Medicine, USA; Diane Addison, Ellen Brazier, Heidi Jones, Elizabeth Kelvin, Sarah Kulkarni, Denis Nash, Matthew Romo, Olga Tymejczyk, Institute for Implementation Science in Population Health, Graduate School of Public Health and Health Policy, City University of New York (CUNY), USA; Batya Elul, Columbia University, USA; Xiatao Cai, Allan Dong, Don Hoover, Hae-Young Kim, Chunshan Li, Qiuhu Shi, Data Solutions, USA; Kathryn Lancaster, The Ohio State University, USA; Mark Kuniholm, University at Albany, State University of New York, USA; Andrew Edmonds, Angela Parcesepe, Jess Edwards, University of North Carolina at Chapel Hill, USA; Olivia Keiser, University of Geneva; Stephany Duda; Vanderbilt University School of Medicine, USA; April Kimmel, Virginia Commonwealth University School of Medicine, USA.

# **EAST AFRICA IeDEA**

## **Funding acknowledgement-Adult and Pediatric**

Research reported in this publication was supported by the National Institute Of Allergy And Infectious Diseases (NIAID), Eunice Kennedy Shriver National Institute Of Child Health & Human Development (NICHD), National Institute On Drug Abuse (NIDA), National Cancer Institute (NCI), and the National Institute of Mental Health (NIMH), National Institute of Diabetes and Digestive and Kidney Diseases (NIDDK) , Fogarty International Center (FIC), National Heart, Lung, and Blood Institute (NHLBI) , in accordance with the regulatory requirements of the National Institutes of Health under Award Number U01AI069911East Africa IeDEA Consortium. The content is solely the responsibility of the authors and does not necessarily represent the official views of the National Institutes of Health.

## **Site investigators and cohorts (no data managers)**

Lameck Diero, Samuel Ayaya (Academic Model Providing Access to Healthcare (AMPATH), Eldoret, Kenya), Elizabeth Bukusi (Family Family AIDS Care & Education Services (FACES), Kisumu, Kenya), Charles Kasozi, Lydia Buzaalirwa (Masaka Regional Referral Hospital, Masaka, Uganda), Mwebesa Bosco Bwana Winnie Muyindike, Helen Byakwaga ((Mbarara University of Science and Technology (MUST),), Barbara Castelnovo, Aggrey Semeere (Infectious Diseases Institute (IDI), Kampala, Uganda), Fred Nalugoda (Rakai Health Sciences Program (RHSP), Kalisizo, Uganda), Paul Kazyoba, Mary Mayige (National Institute for Medical Research (NIMR), Dar es Salaam, Tanzania), Rita Elias Lyamuya (Regional Hospital, Morogoro), Tanzania Kapella Ngonyani (Tumbi Regional Hospital, Pwani, Tanzania); and Mark Urassa , Charles Nyaga NIMR, Mwanza, Tanzania), Batya Elul (Columbia University, New York, USA), Rachel Vreeman (Mt. Sinai, New York, USA) Jennifer Syvertsen (University of California Riverside, California, USA) Rami Kantor (Brown University, Providence, USA), Jeff Martin and Craig Cohen (University of California, San Francisco, USA), ; East Africa IeDEA Regional Data Center, Indiana University: Kara Wools-Kaloustian and Constantin Yiannoutsos.

## **Site investigators and cohorts (with data managers):**

Diero L, Ayaya S, Sang E, MOI University, AMPATH Plus, Eldoret, Kenya; Bukusi E, Edwin Mulwa, George Nyanaro, KEMRI (Kenya Medical Research Institute), Kisumu, Kenya; Charles Kasozi , Mathew Ssemakadde, Masaka Regional Referral Hospital, Masaka, Uganda; Mwebesa Bosco Bwana, Winnie Muyindike, Helen Byakwaga Michael Kanyesigye, Mbarara University of Science and Technology (MUST), Mbarara, Uganda; Barbara Castelnovo, Aggrey Semeere,; John Michael



Matovu, Infectious Diseases Institute (IDI), Mulago, Uganda; Fred Nalugoda, Francis X. Wasswa, Rakai Health Sciences Program, Kalisizo, Uganda; Paul Kazyoba, Mary Mayige, (NIMR), Dar es Salaam, Tanzania; Rita Elias Lyamuya, Francis Mayanga, Morogoro Regional Hospital, Morogoro, Tanzania; Kapella Ngonyani, Jerome Lwali, Tumbi Regional Hospital, Pwani, Tanzania; Mark Urassa, Charles Nyaga, Richard Mchemba, National Institute for Medical Research (NIMR), Kisesa HDSS, Mwanza, Tanzania; Kara Wools-Kaloustian, Constantin Yiannoutsos, Beverly Musick, Indiana University School of Medicine, Indiana University, Indianapolis, IN, USA; Batya Elul, Columbia University, New York City, NY, USA; Rachel Vreeman (Mt. Sinai, New York, USA) Jennifer Syvertsen, (University of California Riverside, California, USA; Rami Kantor, Brown University/Miriam Hospital, Providence, RI, USA; Jeffrey Martin, Megan Wenger, Craig Cohen, Jayne Kulzer, University of California, San Francisco, CA, USA.

# NA-ACCORD

## Funding acknowledgement

The content is solely the responsibility of the authors and does not necessarily represent the official views of the National Institutes of Health. This work was supported by National Institutes of Health grants U01AI069918, F31AI124794, F31DA037788, G12MD007583, K01AI093197, K01AI131895, K23EY013707, K24AI065298, K24AI118591, K24DA000432, KL2TR000421, N01CP01004, N02CP055504, N02CP91027, P30AI027757, P30AI027763, P30AI027767, P30AI036219, P30AI050409, P30AI050410, P30AI094189, P30AI110527, P30MH62246, R01AA016893, R01DA011602, R01DA012568, R01 AG053100, R24AI067039, R34DA045592, U01AA013566, U01AA020790, U01AI038855, U01AI038858, U01AI068634, U01AI068636, U01AI069432, U01AI069434, U01DA03629, U01DA036935, U10EY008057, U10EY008052, U10EY008067, U01HL146192, U01HL146193, U01HL146194, U01HL146201, U01HL146202, U01HL146203, U01HL146204, U01HL146205, U01HL146208, U01HL146240, U01HL146241, U01HL146242, U01HL146245, U01HL146333, U24AA020794, U54MD007587, UL1RR024131, UL1TR000004, UL1TR000083, UL1TR002378, Z01CP010214 and Z01CP010176; contracts CDC-200-2006-18797 and CDC-200-2015-63931 from the Centers for Disease Control and Prevention, USA; contract 90047713 from the Agency for Healthcare Research and Quality, USA; contract 90051652 from the Health Resources and Services Administration, USA; the Grady Health System; grants CBR-86906, CBR-94036, HCP-97105 and TGF-96118 from the Canadian Institutes of Health Research, Canada; Ontario Ministry of Health and Long Term Care, and the Government of Alberta, Canada. Additional support was provided by the National Institute Of Allergy And Infectious Diseases (NIAID), National Cancer Institute (NCI), National Heart, Lung, and Blood Institute (NHLBI), Eunice Kennedy Shriver National Institute Of Child Health & Human Development (NICHD), National Human Genome Research Institute (NHGRI), National Institute for Mental Health (NIMH) and National Institute on Drug Abuse (NIDA), National Institute On Aging (NIA), National Institute Of Dental & Craniofacial Research (NIDCR), National Institute Of Neurological Disorders And Stroke (NINDS), National Institute Of Nursing Research (NINR), National Institute on Alcohol Abuse and Alcoholism (NIAAA), National Institute on Deafness and Other Communication Disorders (NIDCD), and National Institute of Diabetes and Digestive and Kidney Diseases (NIDDK).

\*\*For projects that use cancer data, you must also include: These data were collected by cancer registries participating in the National Program of Cancer Registries (NPCR) of the Centers for Disease Control and Prevention (CDC)\*\*

### **NA-ACCORD Collaborating Cohorts and Representatives:**

AIDS Clinical Trials Group Longitudinal Linked Randomized Trials: Constance A. Benson and Ronald J. Bosch; AIDS Link to the IntraVenous Experience: Gregory D. Kirk; Emory-Grady HIV Clinical Cohort: Vincent Marconi and Jonathan Colasanti; Fenway Health HIV Cohort: Kenneth H. Mayer and Chris Grasso; HAART Observational Medical Evaluation and Research: Robert S. Hogg, Viviane Lima, P. Richard Harrigan, Julio SG Montaner, Benita Yip, Julia Zhu, and Kate Salters; HIV Outpatient Study: Kate Buchacz and Jun Li; HIV Research Network: Kelly A. Gebo and Richard D. Moore; Johns Hopkins HIV Clinical Cohort: Richard D. Moore; John T. Carey Special Immunology Unit Patient Care and Research Database, Case Western Reserve University: Jeffrey Jacobson; Kaiser Permanente Mid-Atlantic States: Michael A. Horberg; Kaiser Permanente Northern California: Michael J. Silverberg; Longitudinal Study of Ocular Complications of AIDS: Jennifer E. Thorne; MACS/WIHS Combined Cohort Study: Todd Brown, Phyllis Tien, and Gypsyamber D'Souza; Maple Leaf Medical Clinic: Graham Smith, Mona Loutfy, and Meenakshi Gupta; The McGill University Health Centre, Chronic Viral Illness Service Cohort: Marina B. Klein; Multicenter Hemophilia Cohort Study-II: Charles Rabkin; Ontario HIV Treatment Network Cohort Study: Abigail Kroch, Ann Burchell, Adrian Betts, and Joanne Lindsay; Parkland/UT Southwestern Cohort: Ank Nijhawan; Retrovirus Research Center, Universidad Central del Caribe, Bayamon Puerto Rico: Robert F. Hunter-Mellado and Angel M. Mayor; Southern Alberta Clinic Cohort: M. John Gill; Study of the Consequences of the Protease Inhibitor Era: Jeffrey N. Martin; Study to Understand the Natural History of HIV/AIDS in the Era of Effective Therapy: Jun Li and John T. Brooks; University of Alabama at Birmingham 1917 Clinic Cohort: Michael S. Saag, Michael J. Mugavero, and James Willig; University of California at San Diego: Laura Bamford and Maile Karris; University of North Carolina at Chapel Hill HIV Clinic Cohort: Joseph J. Eron and Sonia Napravnik; University of Washington HIV Cohort: Mari M. Kitahata and Heidi M. Crane; Vanderbilt Comprehensive Care Clinic HIV Cohort: Timothy R. Sterling, David Haas, Peter Rebeiro, and Megan Turner; Veterans Aging Cohort Study: Lesley Park and Amy Justice

### **NA-ACCORD Study Administration:**

Executive Committee: Richard D. Moore, Keri N. Althoff, Stephen J. Gange, Mari M. Kitahata, Jennifer S. Lee, Michael S. Saag, Michael A. Horberg, Marina B. Klein, Rosemary G. McKaig, and Aimee M. Freeman; Administrative Core: Richard D. Moore, Keri N. Althoff, and Aimee M. Freeman; Data Management Core: Mari M. Kitahata, Stephen E. Van Rompaey, Heidi M. Crane, Liz Morton, Justin McReynolds, and William B. Lober; Epidemiology and Biostatistics Core: Stephen J. Gange, Jennifer S. Lee, Brenna Hogan, Bin You, Elizabeth Humes, Lucas Gerace, Cameron Stewart, and Sally Coburn

## **IeDEA Southern Africa**

### **Funding acknowledgement**

Each publication, press release, or other document about research supported by an NIH award must include an acknowledgment of NIH award support and a disclaimer such as *“Research reported in this publication was supported by the U.S. National Institutes of Health’s National Institute of Allergy and Infectious Diseases, the Eunice Kennedy Shriver National Institute of Child Health and Human Development, the National Cancer Institute, the National Institute of Mental Health, the National Institute on Drug Abuse, the National Heart, Lung, and Blood Institute, the National Institute on Alcohol Abuse and Alcoholism, the National Institute of Diabetes and Digestive and Kidney Diseases and the Fogarty International Center under Award Number U01AI069924. The content is solely the responsibility of the authors and does not necessarily represent the official views of the National Institutes of Health.”* Prior to issuing a press release concerning the outcome of this research, please notify the NIH awarding IC in advance to allow for coordination.

### **Site investigators and cohorts:**

Gary Maartens, Aid for AIDS, South Africa; Carolyn Bolton, Centre for Infectious Disease Research in Zambia (CIDRZ), Zambia; Robin Wood, Gugulethu (Desmond Tutu HIV Centre), South Africa; Nosisa Sipambo, Harriet Shezi Children’s Clinic, South Africa; Frank Tanser, Hlabisa (Africa Health Research Institute), South Africa; Andrew Boulle, Khayelitsha ART Programme, South Africa; Geoffrey Fatti, Kheth’Impilo AIDS Free Living, South Africa; Sam Phiri, Lighthouse Trust, Malawi; Elvira Singh, National Cancer Registry (National Health Laboratory Service), South Africa; Cleophas Chimbetete, Newlands Clinic (Ruedi Luethy Foundation Zimbabwe), Zimbabwe; Karl Technau, Rahima Moosa Mother and Child Hospital, South Africa; Brian Eley, Red Cross War Memorial Children’s Hospital, South Africa; Josephine Muhairwe, SolidarMed Lesotho; Idivino Rafael, SolidarMed Mozambique; Cordelia Kunzekwenyika, SolidarMed Zimbabwe, Matthew P Fox, Themba Lethu Clinic, South Africa; Hans Prozesky, Tygerberg Hospital, South Africa.

### **Data centers:**

Nina Anderegg, Marie Ballif, Benedikt Christ, Cam Ha Dao Ostinelli, Matthias Egger, Lukas Fenner, Andreas Haas, Anthony Hauser, Stefanie Hossmann, Serra Lem, Catrina Mugglin, Radoslaw Panczak, Eliane Rohner, Julien Riou, Veronika Skrivankova, Lilian Smith, Katayoun Taghavi, Per von Groote, Gilles Wandeler, Elizabeth Zaniewski, Kathrin Zürcher, Institute of Social and Preventive Medicine, University of Bern, Switzerland; Kim Anderson, Andrew Boulle, Morna Cornell, Mary-Ann Davies, Victoria Iyun, Leigh Johnson, Reshma Kassanjee, Kathleen Kehoe, Mmamapudi Kubjane, Nicola

Maxwell, Patience Nyakato, Gem Patten, Mpho Tlali, Priscilla Tsondai, Renee de Waal, School of Public Health and Family Medicine, University of Cape Town, South Africa.

## West Africa

### Funding acknowledgement

Each publication, press release, or other document about research supported by an NIH award must include an acknowledgment of NIH award support and a disclaimer such as “Research reported in this publication was supported by the US National Institutes of Health (NIAID, NICHD, NCI and NIMH) under Award Number U01AI069919 (PI: Dabis). The content is solely the responsibility of the authors and does not necessarily represent the official views of the National Institutes of Health.” Prior to issuing a press release concerning the outcome of this research, please notify the NIH awarding Institute/Centre in advance to allow for coordination.

### Site investigators and cohorts:

Adult cohorts: Marcel Djimon Zannou, CNHU, Cotonou, Benin; Armel Poda, CHU Souro Sanou, Bobo Dioulasso, Burkina Faso; Fred Stephen Sarfo & Komfo Anokye Teaching Hospital, Kumasi, Ghana; Eugene Messou, ACONDA CePreF, Abidjan, Cote d’Ivoire; Henri Chenal, CIRBA, Abidjan, Cote d’Ivoire; Kla Albert Minga, CNTS, Abidjan, Cote d’Ivoire; Emmanuel Bissagnene, & Aristophane Tanon, CHU Treichville, Cote d’Ivoire; Moussa Seydi, CHU de Fann, Dakar, Senegal; Akessiwe Akouda Patassi, CHU Sylvanus Olympio, Lomé, Togo.

Pediatric cohorts: Sikiratou Adouni Koumakpai-Adeothy, CNHU, Cotonou, Benin; Lorna Awo Renner, Korle Bu Hospital, Accra, Ghana; Sylvie Marie N’Gbeche, ACONDA CePreF, Abidjan, Ivory Coast; Clarisse Amani Bosse, ACONDA\_MTCT+, Abidjan, Ivory Coast; Kouadio Kouakou, CIRBA, Abidjan, Cote d’Ivoire; Madeleine Amorissani Folquet, CHU de Cocody, Abidjan, Cote d’Ivoire; François Tanoh Eboua, CHU de Yopougon, Abidjan, Cote d’Ivoire; Fatoumata Dicko Traore, Hopital Gabriel Toure, Bamako, Mali; Elom Takassi, CHU Sylvanus Olympio, Lomé, Togo

### Coordinating & data centers:

François Dabis, Elise Arrive, Eric Balestre, Renaud Becquet, Charlotte Bernard, Shino Chassagne Arikawa, Alexandra Doring, Antoine Jaquet, Karen Malateste, Elodie Rabourdin, Thierry Tiendrebeogo, ADERA, Isped & INSERM U1219, Bordeaux, France.

Sophie Desmonde, Julie Jesson, Valeriane Leroy, Inserm 1027, Toulouse, France

Didier Koumavi Ekouevi, Jean-Claude Azani, Patrick Coffie, Abdoulaye Cissé, Guy Gnepa, Apollinaire Horo, Christian Kouadio, Boris Tchounga, PACCI, CHU Treichville, Abidjan, Côte d’Ivoire
